# Supplementary material
Source: PubMed Central journal article supplement (PMC3365926)
Supplement: supp_M111.298968_jbc.M111.298968-1.pdf [file supp_M111.298968_jbc.M111.298968-1.pdf]

**SUPPLEMENTAL FIGURE 1**

*Hierarchical clustering analysis of the multivariate data listed in table 2. Apparent tissue clusters are marked out. F=femoral head, H=humeral head and K=tibial knee were articular cartilages while the other cartilage types were from M=meniscus, AF= annulus fibrosus, NP=nucleus pulposus, R=rib and T=trachea.*

**SUPPLEMENTAL TABLE 1**

List of all detected proteins in tissue extracts using the 2D-LCMS with ITRAQ quantification from eight human cartilage subtypes (n=5-6).

**SUPPLEMENTAL TABLE 2**

List of proteins omitted from the total list presented in supplemental table 1.

**SUPPLEMENTAL TABLE 3A-3K**

Significantly differentially abundant proteins ( $P \leq 0.05$ ) using pairwise tissue comparisons of cartilage tissue extracts.

# Supplemental Figure 1

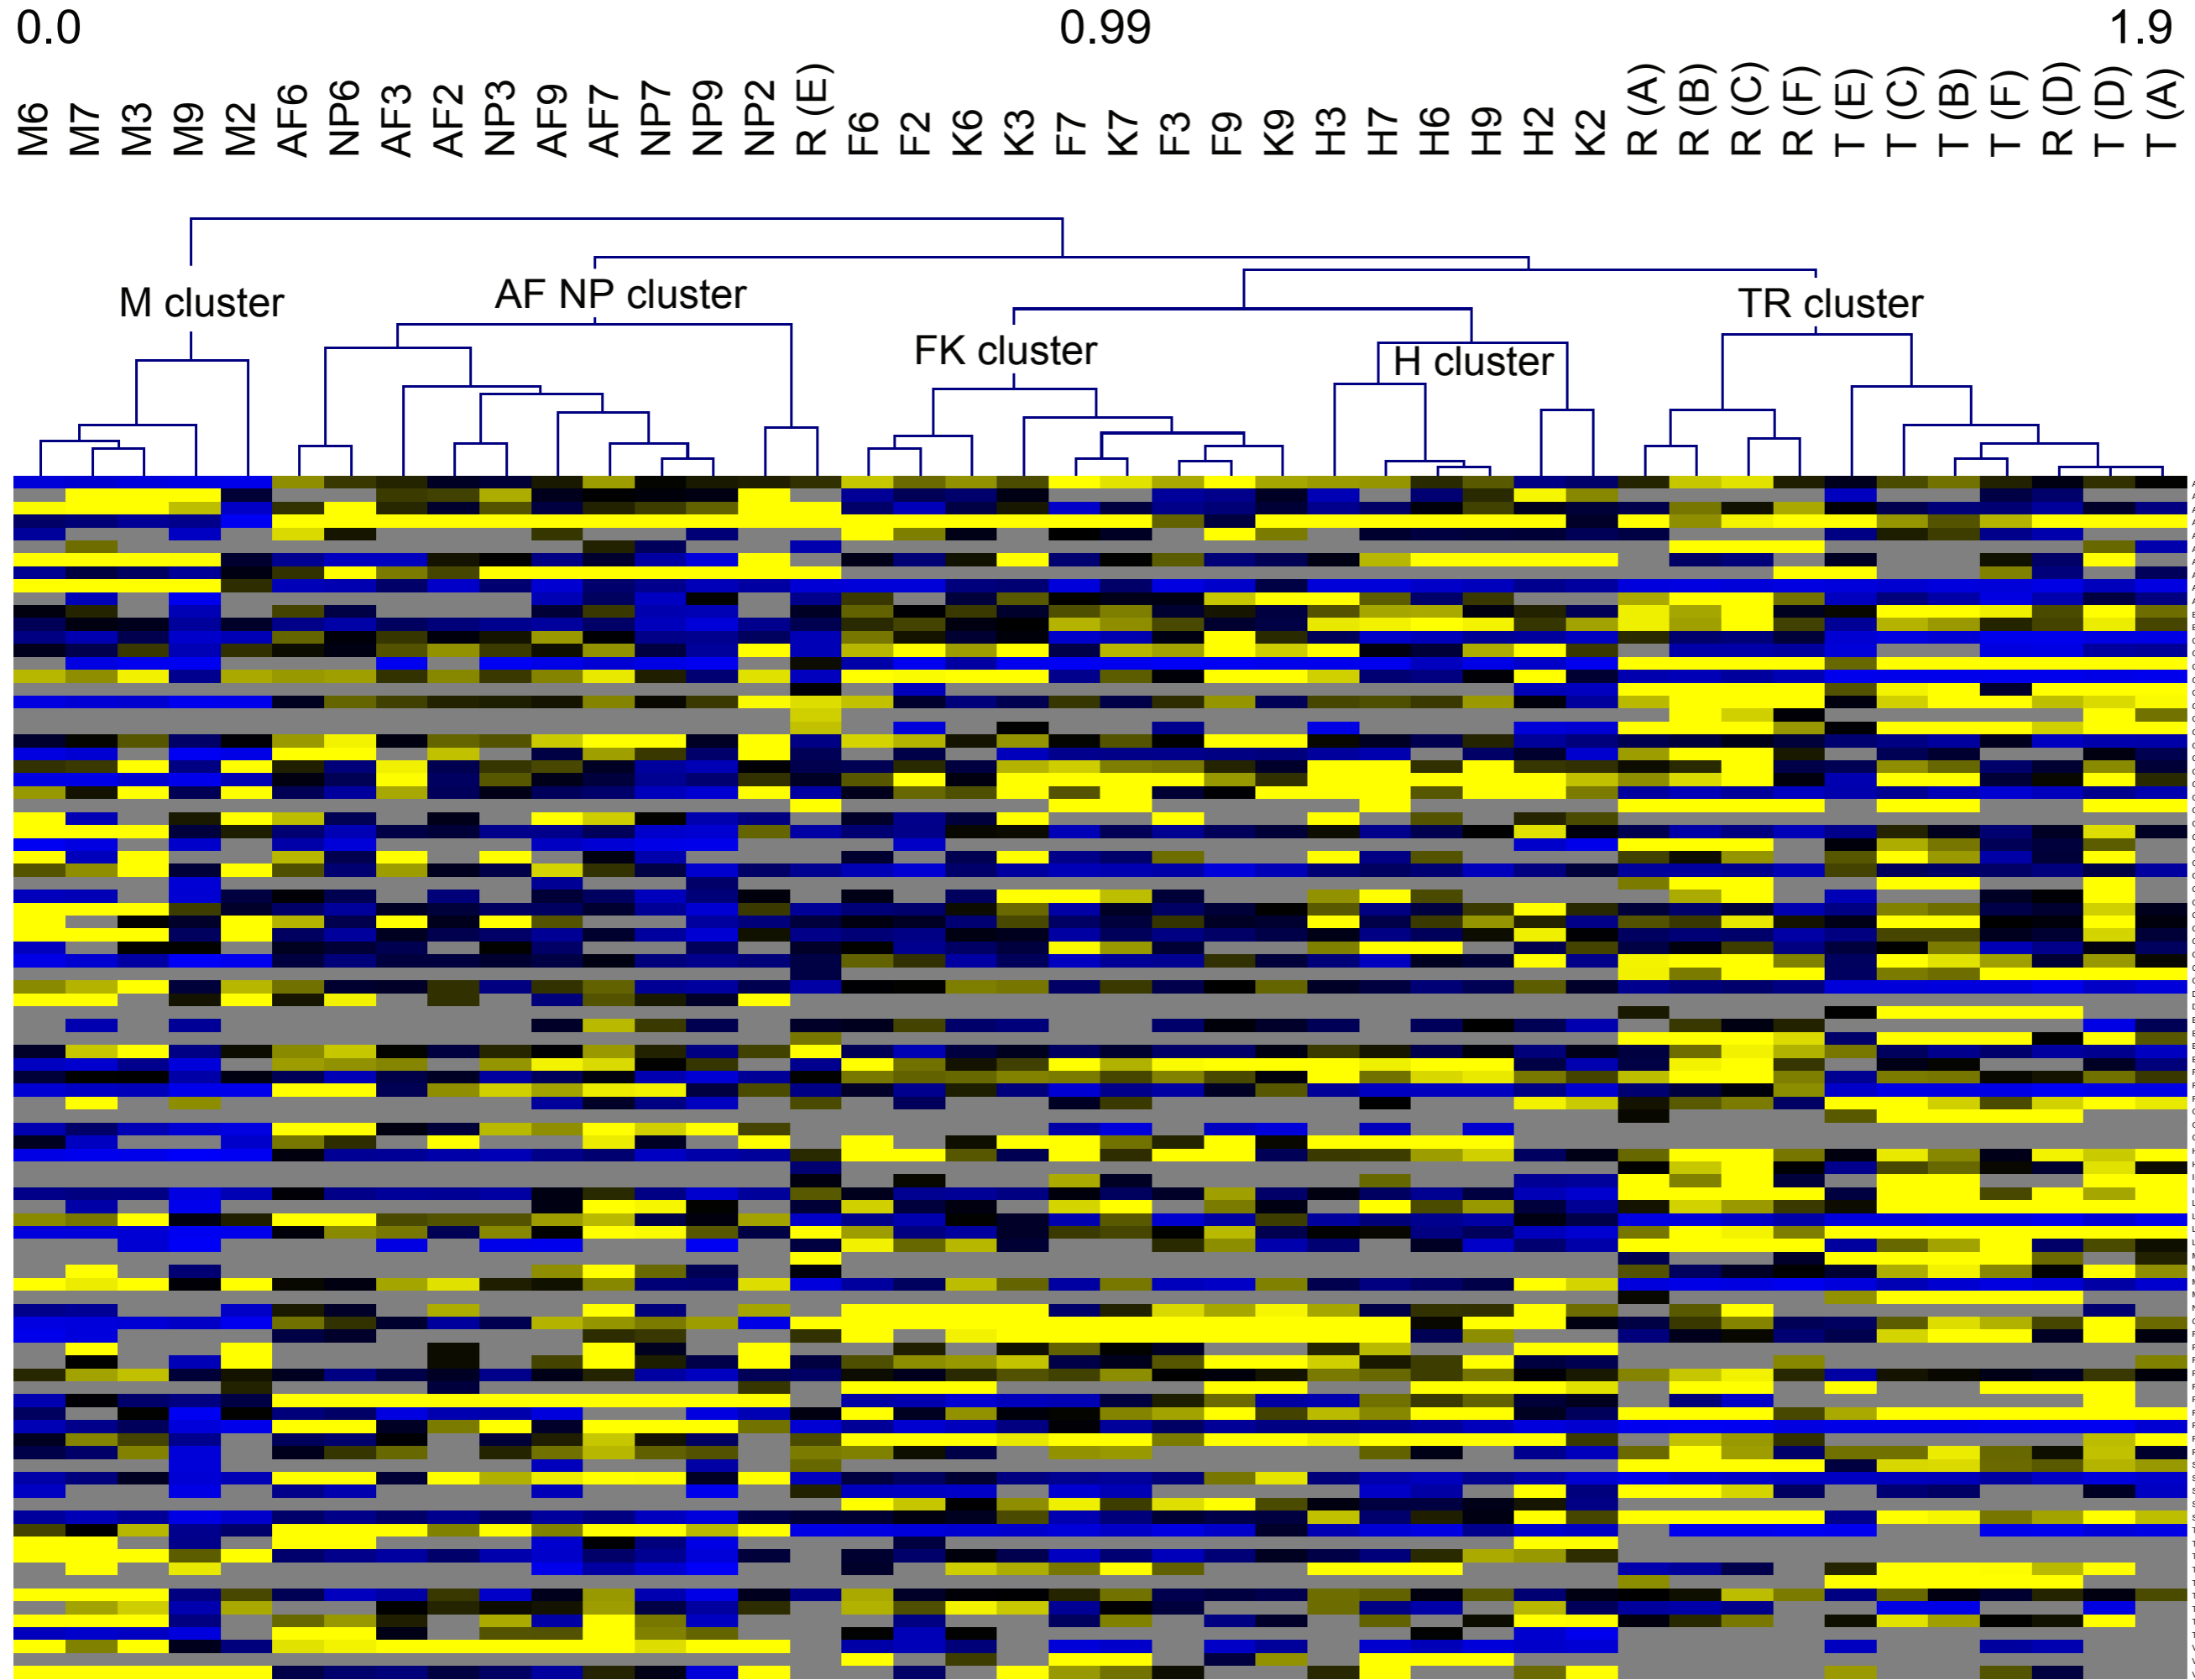

**Supplemental table 1**

| Protein name                               | Accession | F7   | F6   | F3    | F9   | F2   | F-mean | H7   | H6   | H3    | H9   | H2   | H-mean | K7   | K6   | K3    | K9   | K2   | K-mean | M7   | M6   | M3    | M9   | M2   | M-mean |
|--------------------------------------------|-----------|------|------|-------|------|------|--------|------|------|-------|------|------|--------|------|------|-------|------|------|--------|------|------|-------|------|------|--------|
| 14-3-3 protein eta                         | Q04917    |      |      |       |      |      | ND     |
| 14-3-3 protein gamma                       | P61981    |      |      |       |      |      | ND     |      |      |       |      |      | ND     |      |      |       |      |      | ND     | 2.21 | 1.61 |       |      |      | 1.91   |
| 14-3-3 protein theta                       | P27348    |      |      |       |      |      | ND     |
| 14-3-3 protein zeta/delta                  | P63104    |      |      |       |      |      | ND     |
| 1-phosphatidylinositol-4,5-bisphosphate ph | P51178    |      |      |       |      |      | ND     |
| 40S ribosomal protein S20                  | P60866    |      |      |       |      | 1.45 | 1.45   |      |      |       |      | 2.00 | 2.00   |      |      |       | 1.30 | 1.30 | 1.30   |      |      |       |      |      | ND     |
| 4-trimethylaminobutylaldehyde dehydrogen   | P49189    |      |      |       |      |      | ND     |
| 78 kDa glucose-regulated protein           | P11021    |      |      |       |      |      | ND     |      |      |       |      |      | ND     |      |      |       |      |      | ND     | 1.55 |      |       |      |      | 1.55   |
| Actin, alpha cardiac muscle 1              | P68032    |      |      |       |      |      | ND     |
| Actin, aortic smooth muscle                | P62736    | 0.30 |      | 0.514 | 0.46 | 0.32 | 0.40   | 0.52 |      | 0.615 | 0.79 | 1.50 | 0.86   | 0.59 |      | 0.543 | 0.34 | 1.25 | 0.68   |      |      |       |      |      | ND     |
| Actin, cytoplasmic 1                       | P60709    | 0.34 | 0.44 | 0.532 | 0.48 | 0.33 | 0.42   | 0.54 | 0.65 | 0.494 | 0.81 | 1.50 | 0.80   | 0.62 | 0.48 | 0.538 | 0.36 | 1.29 | 0.66   | 2.13 | 1.55 | 0.763 | 0.79 | 0.54 | 1.15   |
| Adenomatous polyposis coli protein 2       | O95996    | 0.57 | 2.83 |       |      |      | 1.70   | 0.33 | 0.42 |       |      |      | 0.37   | 1.16 | 2.03 |       |      |      | 1.60   |      |      | 2.453 |      | 1.97 | 2.21   |
| Adenylate kinase isoenzyme 1               | P00568    |      |      |       |      |      | ND     |
| Adenylyl cyclase-associated protein 1      | Q01518    |      |      |       |      |      | ND     |
| Adipocyte enhancer-binding protein 1       | Q8IUX7    |      |      |       |      | 0.39 | 0.39   |      |      |       |      | 3.22 | 3.22   |      |      |       |      | 0.92 | 0.92   |      |      |       |      |      | ND     |
| Adseverin                                  | Q9Y6U3    |      |      |       |      |      | ND     |
| Aggrecan core protein                      | P16112    | 2.08 | 1.70 | 1.593 | 2.42 | 1.37 | 1.83   | 1.52 | 1.14 | 1.544 | 1.31 | 0.47 | 1.20   | 1.80 | 1.51 | 1.264 | 1.58 | 0.57 | 1.34   | 0.18 | 0.15 | 0.135 | 0.10 | 0.08 | 0.13   |
| Alcohol dehydrogenase [NADP+]              | P14550    | 0.00 |      |       |      |      | 0.00   | 2.20 |      |       |      |      | 2.20   | 2.87 |      |       |      |      | 2.87   |      |      | 3.591 |      |      | 3.59   |
| Alcohol dehydrogenase 1B                   | P00325    |      |      | 1.477 |      |      | 1.48   |      |      | 0.935 |      |      | 0.94   |      |      | 2.096 |      |      | 2.10   |      |      | 6.55  |      |      | 6.55   |
| Alpha-1-acid glycoprotein 1                | P02763    | 0.53 | 0.95 | 0.517 | 1.25 | 1.37 | 0.92   | 2.15 | 3.54 | 0.560 | 4.48 | 5.09 | 3.17   | 1.83 | 1.90 | 1.795 | 4.01 | 4.11 | 2.73   | 5.39 | 5.40 | 4.885 | 9.01 | 2.41 | 5.42   |
| Alpha-1-antichymotrypsin                   | P01011    |      | 0.40 | 0.383 | 0.45 | 0.65 | 0.47   |      | 0.54 | 0.289 | 1.14 | 1.87 | 0.96   |      | 0.56 | 0.906 | 0.84 | 1.47 | 0.95   | 2.40 |      | 2.109 | 2.19 | 0.78 | 1.87   |
| Alpha-1-antitrypsin                        | P01009    | 0.21 | 0.58 | 0.457 | 0.53 | 0.27 | 0.41   | 0.59 | 0.95 | 0.435 | 1.22 | 0.87 | 0.81   | 0.73 | 0.72 | 1.077 | 0.78 | 0.77 | 0.81   | 1.94 | 1.88 | 2.014 | 1.67 | 0.22 | 1.55   |
| Alpha-1B-glycoprotein                      | P04217    |      |      |       |      | 1.00 | 1.00   |      |      |       |      | 5.89 | 5.89   |      |      |       |      | 5.58 | 5.58   |      |      |       | 1.51 | 2.41 | 1.96   |
| Alpha-2-HS-glycoprotein                    | P02765    |      | 0.91 | 1.041 |      |      | 0.97   |      | 1.78 | 1.143 |      |      | 1.46   |      | 1.50 | 1.821 |      |      | 1.66   | 2.96 |      |       | 1.40 | 0.48 | 1.61   |
| Alpha-2-macroglobulin                      | P01023    | 0.10 | 0.16 | 0.110 | 0.06 | 0.12 | 0.11   | 0.13 | 0.14 | 0.123 | 0.11 | 0.17 | 0.13   | 0.13 | 0.20 | 0.257 | 0.07 | 0.16 | 0.16   | 0.22 | 0.12 | 0.507 | 0.13 | 0.10 | 0.22   |
| Alpha-actinin-1                            | P12814    |      |      |       |      |      | ND     |
| Alpha-crystallin B chain                   | P02511    | 0.64 |      |       |      |      | 0.64   | 0.73 |      |       |      |      | 0.73   | 0.82 |      |       |      |      | 0.82   |      |      | 1.672 | 2.13 |      | 1.90   |
| Alpha-enolase                              | P06733    | 1.01 | 1.22 | 1.209 | 1.41 | 1.48 | 1.27   | 1.23 | 1.67 | 1.504 | 1.95 | 1.77 | 1.62   | 2.04 | 1.75 | 1.461 | 1.41 | 1.38 | 1.61   | 1.47 | 1.38 | 0.982 | 0.55 | 0.90 | 1.06   |
| Angiogenin                                 | P03950    | 2.01 | 6.10 | 1.339 | 0.74 | 3.27 | 2.69   | 2.56 | 3.95 | 2.561 | 3.25 | 2.61 | 2.98   | 3.01 | 2.57 | 2.226 | 2.70 | 0.83 | 2.26   | 0.53 | 0.59 | 0.405 | 0.45 | 0.04 | 0.40   |
| Angiopoietin-related protein 2             | Q9UKU9    | 0.98 | 2.13 |       | 3.15 | 1.44 | 1.93   | 0.81 | 0.73 |       | 0.76 | 0.78 | 0.77   | 0.84 | 0.90 |       | 1.43 | 0.65 | 0.95   |      | 0.39 |       | 0.23 |      | 0.31   |
| Angiopoietin-related protein 7             | O43827    |      |      |       |      |      | ND     |      |      |       |      |      | ND     |      |      |       |      |      | ND     | 1.38 |      |       |      |      | 1.38   |
| Annexin A1                                 | P04083    | 0.83 | 1.61 | 1.224 | 1.19 | 0.68 | 1.11   | 1.57 | 2.29 | 1.664 | 2.06 | 1.20 | 1.76   | 1.54 | 1.23 | 1.228 | 1.22 | 1.19 | 1.28   | 2.05 | 1.89 |       | 2.03 |      | 1.99   |
| Annexin A2                                 | P07355    |      |      | 1.081 | 1.47 | 0.46 | 1.00   |      |      | 1.273 | 2.37 | 0.96 | 1.53   |      |      | 1.199 | 1.89 | 1.18 | 1.42   | 1.61 | 1.62 |       | 0.88 |      | 1.37   |
| Annexin A5                                 | P08758    | 0.51 | 0.54 |       | 0.74 | 0.54 | 0.58   | 0.49 | 0.86 |       | 1.17 | 0.98 | 0.87   | 1.13 | 1.26 |       | 0.74 | 0.66 | 0.95   | 1.60 | 0.57 |       | 0.48 |      | 0.88   |
| Annexin A6                                 | P08133    | 1.03 |      |       |      |      | 1.03   | 1.03 |      |       |      |      | 1.03   | 1.37 |      |       |      |      | 1.37   | 1.38 |      |       | 0.89 |      | 1.14   |
| Antithrombin-III                           | P01008    |      |      |       | 0.90 | 0.75 | 0.82   |      |      |       | 2.49 | 2.19 | 2.34   |      |      |       | 1.76 | 1.85 | 1.80   |      |      |       | 3.96 |      | 3.96   |
| Apolipoprotein A-I                         | P02647    | 0.55 | 0.89 | 1.318 | 0.52 | 0.53 | 0.76   | 1.64 | 2.27 | 0.907 | 1.98 | 3.48 | 2.06   | 1.00 | 1.05 | 3.155 | 0.66 | 3.81 | 1.93   | 3.26 | 2.64 | 4.412 | 1.89 | 0.80 | 2.60   |
| Apolipoprotein D                           | P05090    |      |      |       |      |      | ND     |      |      |       |      |      | ND     |      |      |       |      |      | ND     | 0.73 | 0.42 | 0.613 | 0.40 | 0.91 | 0.62   |
| Argininosuccinate synthase                 | P00966    |      |      |       |      |      | ND     |
| Asporin                                    | Q9BXN1    | 0.14 | 0.15 | 0.114 | 0.20 | 0.15 | 0.15   | 0.15 | 0.21 | 0.145 | 0.26 | 0.43 | 0.24   | 0.58 | 0.50 | 0.542 | 0.72 | 0.37 | 0.54   | 3.99 | 3.28 | 5.025 | 1.97 | 1.15 | 3.08   |
| ATP synthase subunit beta, mitochondrial   | P06576    |      |      |       |      |      | ND     |
| Augurin                                    | Q9H1Z8    | 0.99 | 1.19 | 0.903 | 1.70 |      | 1.19   | 1.32 | 0.57 | 3.220 | 1.19 |      | 1.57   | 0.89 | 0.76 | 1.304 | 2.30 |      | 1.31   | 0.28 |      |       | 0.06 |      | 0.17   |
| Bardet-Biedl syndrome 12 protein           | Q6ZW61    |      |      |       |      | 0.33 | 0.33   |      |      |       |      | 1.54 | 1.54   |      |      |       |      | 0.73 | 0.73   |      |      |       |      |      | ND     |
| Basement membrane-specific heparan sulf    | P98160    | 1.27 | 1.34 | 0.799 | 1.07 | 0.97 | 1.09   | 1.58 | 1.59 | 1.289 | 0.92 | 1.11 | 1.30   | 1.44 | 1.20 | 0.817 | 0.74 | 0.65 | 0.97   | 1.12 | 0.93 |       | 0.29 |      | 0.78   |
| Beta-2-glycoprotein 1                      | P02749    |      |      |       |      | 0.30 | 0.30   |      |      |       |      | 7.17 | 7.17   |      |      |       |      | 4.71 | 4.71   |      |      |       |      |      | ND     |
| Beta-enolase                               | P13929    | 1.08 |      |       |      | 0.94 | 1.01   | 3.35 |      |       |      | 3.31 | 3.33   | 1.93 |      |       |      | 0.28 | 1.11   |      |      |       |      |      | ND     |
| Biglycan                                   | P21810    | 1.63 | 1.14 | 1.252 | 0.80 | 1.23 | 1.21   | 1.85 | 2.04 | 1.816 | 1.86 | 1.18 | 1.75   | 1.50 | 0.92 | 0.988 | 0.72 | 1.57 | 1.14   | 0.92 | 0.65 | 0.876 | 0.39 | 0.83 | 0.73   |
| Bone morphogenetic protein 3b              | P55107    |      | 1.35 |       | 6.26 |      | 3.80   |      | 1.10 |       | 2.64 |      | 1.87   |      | 0.50 |       | 1.48 |      | 0.99   |      |      |       |      |      | ND     |
| Calmodulin                                 | P62158    |      |      |       |      |      | ND     |      |      |       |      |      | ND     |      |      |       |      |      | ND     |      |      |       | 3.07 |      | 3.07   |
| Carbohydrate sulfotransferase 3            | Q7LGC8    |      |      |       |      |      | ND     |
| Carbonic anhydrase 1                       | P00915    | 0.79 | 1.15 | 1.103 | 0.80 | 0.41 | 0.85   | 2.50 | 0.74 | 0.594 | 3.92 | 0.63 | 1.68   | 4.52 | 1.08 | 2.150 | 0.42 | 0.40 | 1.71   | 3.74 | 2.65 | 2.885 | 0.17 | 0.35 | 1.96   |
| Carbonic anhydrase 2                       | P00918    | 1.50 |      |       |      |      | 1.50   | 2.72 |      |       |      |      | 2.72   | 4.51 |      |       |      |      | 4.51   | 2.28 |      |       |      |      | 2.28   |
| Carbonic anhydrase 3                       | P07451    | 0.63 | 2.45 | 0.832 |      | 1.34 | 1.31   | 3.88 | 3.59 | 2.475 |      | 6.10 | 4.01   | 4.43 | 0.39 | 0.618 |      | 0.43 | 1.47   | 3.77 |      |       |      |      | 3.77   |
| Carbonyl reductase [NADPH] 3               | O75828    |      |      |       |      |      | ND     |

|                                                 |                 |           |           |           |           |           |               |           |           |           |           |           |               |           |           |           |           |           |               |           |           |           |           |           |               |      |
|-------------------------------------------------|-----------------|-----------|-----------|-----------|-----------|-----------|---------------|-----------|-----------|-----------|-----------|-----------|---------------|-----------|-----------|-----------|-----------|-----------|---------------|-----------|-----------|-----------|-----------|-----------|---------------|------|
| <i>Cartilage intermediate layer protein 1</i>   | O75339          | 0.20      | 1.41      | 0.915     | 2.22      | 1.06      | 1.16          | 0.21      | 0.27      | 0.645     | 0.41      | 0.38      | 0.38          | 0.30      | 0.79      | 0.949     | 1.14      | 0.24      | 0.68          | 0.30      | 0.48      | 0.684     | 0.20      | 0.28      | 0.39          |      |
| <i>Cartilage intermediate layer protein 2</i>   | Q8IUJL          | 0.70      | 1.64      | 1.570     | 2.40      | 2.99      | 1.86          | 0.93      | 0.77      | 2.246     | 1.61      | 2.05      | 1.52          | 1.64      | 1.55      | 2.370     | 1.72      | 1.19      | 1.69          | 0.69      | 0.88      | 1.192     | 0.29      | 1.16      | 0.84          |      |
| <i>Cartilage matrix protein</i>                 | P21941          | 0.04      | 0.33      | 0.028     | 0.04      | 0.05      | 0.10          | 0.07      | 0.25      | 0.070     | 0.09      | 0.21      | 0.14          | 0.06      | 0.36      | 0.061     | 0.08      | 0.06      | 0.12          | 0.12      |           | 0.065     | 0.05      |           | 0.08          |      |
| <i>Cartilage oligomeric matrix protein</i>      | P49747          | 0.44      | 2.41      | 0.957     | 2.84      | 1.88      | 1.70          | 0.54      | 0.49      | 1.732     | 0.96      | 2.38      | 1.22          | 1.32      | 2.79      | 2.525     | 2.68      | 0.79      | 2.02          | 1.50      | 1.64      | 1.852     | 0.43      | 1.59      | 1.40          |      |
| <i>Cathepsin D</i>                              | P07339          |           |           |           |           |           | ND            |           |           |           |           |           | ND            |           |           |           |           |           | ND            |           |           |           | 0.75      |           | 0.75          |      |
| <i>Cathepsin G</i>                              | P08311          |           |           |           |           |           | ND            |           |           |           |           |           | ND            |           |           |           |           |           | ND            |           |           |           | 0.96      |           | 0.96          |      |
| <i>C-C motif chemokine 21</i>                   | O00585          |           |           |           |           | 0.26      | 0.26          |           |           |           |           | 0.28      | 0.28          |           |           |           |           | 0.25      | 0.25          |           |           |           |           |           | ND            |      |
| <i>CD44 antigen</i>                             | P16070          |           |           |           |           |           | ND            |           |           |           |           |           | ND            |           |           |           |           |           | ND            | 1.69      |           |           |           |           | 1.69          |      |
| <i>CD9 antigen</i>                              | P21926          |           |           |           |           |           | ND            |      |
| <i>Ceruloplasmin</i>                            | P00450          |           |           |           |           | 0.20      | 0.20          |           |           |           |           | 2.01      | 2.01          |           |           |           |           | 1.61      | 1.61          |           | 1.89      |           |           | 0.47      | 1.18          |      |
| <i>Chondroadherin</i>                           | O15335          | 1.18      | 1.68      | 1.149     | 1.52      | 0.81      | 1.27          | 1.27      | 1.20      | 1.239     | 1.54      | 0.94      | 1.24          | 0.70      | 0.51      | 0.677     | 0.65      | 0.38      | 0.58          | 0.16      | 0.11      | 0.183     | 0.06      | 0.08      | 0.12          |      |
| <i>Chondroitin sulfate proteoglycan 4</i>       | Q6UVK1          |           |           |           |           |           | ND            |      |
| <i>Chondromodulin-1</i>                         | O75829          |           |           | 0.433     |           | 0.14      | 0.29          |           |           | 0.099     |           | 0.15      | 0.12          |           |           | 0.000     |           | 0.17      | 0.09          |           |           |           |           |           | ND            |      |
| <i>Chordin-like protein 2</i>                   | Q6WN34          |           |           |           |           |           | ND            |           |           |           |           |           | ND            |           |           |           |           |           | ND            |           |           | 0.853     |           |           | 0.85          |      |
| <i>Clusterin</i>                                | P10909          | 1.01      | 1.75      | 0.993     | 2.55      | 1.63      | 1.59          | 0.84      | 0.67      | 1.020     | 1.12      | 0.39      | 0.81          | 1.29      | 1.06      | 1.518     | 2.11      | 0.50      | 1.29          | 1.01      | 0.81      | 1.296     | 0.59      | 0.96      | 0.93          |      |
| <i>Coagulation factor XIII A chain</i>          | P00488          |           | 0.51      | 0.425     |           |           | 0.47          |           | 0.86      | 0.721     |           |           | 0.79          |           | 0.87      | 0.719     |           |           | 0.80          |           | 0.43      |           | 0.00      |           | 0.21          |      |
| <i>Cofilin-1</i>                                | P23528          |           |           |           | 0.85      |           | 0.85          |           |           |           | 1.54      |           | 1.54          |           |           | 1.22      |           |           | 1.22          |           |           |           |           |           | ND            |      |
| <i>Coiled-coil domain-containing protein 80</i> | Q76M96          | 0.44      |           | 0.453     | 0.48      | 0.70      | 0.52          | 0.31      |           | 0.375     | 0.59      | 0.81      | 0.52          | 0.46      |           | 0.256     | 0.50      | 0.19      | 0.35          | 0.17      | 0.11      |           | 0.04      | 0.09      | 0.10          |      |
| <i>Collagen alpha-1(I) chain</i>                | P02452          | 1.72      | 0.66      | 1.416     | 1.12      | 1.14      | 1.21          | 2.34      | 1.16      | 4.498     | 2.51      | 1.18      | 2.34          | 1.44      | 0.73      | 1.632     | 0.82      | 1.16      | 1.16          | 1.20      | 1.17      | 2.063     | 0.48      | 4.25      | 1.83          |      |
| <i>Collagen alpha-1(II) chain</i>               | P02458          | 2.92      | 1.30      | 2.062     | 1.53      | 2.39      | 2.04          | 3.98      | 1.98      | 6.842     | 4.38      | 2.42      | 3.92          | 2.34      | 0.92      | 2.252     | 1.16      | 1.68      | 1.67          | 0.09      | 0.10      | 0.181     | 0.08      | 0.29      | 0.15          |      |
| <i>Collagen alpha-1(III) chain</i>              | P02461          | 1.29      | 0.88      | 0.786     | 0.97      | 1.36      | 1.06          | 2.11      | 1.30      | 2.916     | 2.49      | 2.20      | 2.20          | 3.25      | 1.27      | 2.989     | 1.93      | 1.43      | 2.17          | 1.06      | 1.53      | 4.254     | 0.66      | 4.00      | 2.30          |      |
| <i>Collagen alpha-1(IX) chain</i>               | P20849          | 3.96      |           |           |           |           | 3.96          | 6.76      |           |           |           |           | 6.76          | 4.21      |           |           |           |           | 4.21          |           |           |           |           |           | ND            |      |
| <i>Collagen alpha-1(V) chain</i>                | P20908          |           | 0.83      | 2.005     |           | 0.45      | 1.09          |           | 1.29      | 3.907     |           | 1.12      | 2.11          |           | 0.75      | 2.595     |           | 1.26      | 1.53          | 0.29      | 2.09      |           | 1.08      | 6.32      | 2.44          |      |
| <i>Collagen alpha-1(VI) chain</i>               | P12109          | 0.28      | 0.54      | 0.426     | 0.63      | 0.46      | 0.47          | 0.44      | 0.67      | 1.038     | 0.98      | 1.79      | 0.98          | 0.65      | 1.02      | 1.028     | 0.77      | 0.94      | 0.88          | 2.76      | 3.36      | 2.815     | 0.75      | 1.09      | 2.15          |      |
| <i>Collagen alpha-1(X) chain</i>                | Q03692          |           |           |           |           | 0.22      | 0.22          |           |           |           |           | 0.20      | 0.20          |           |           |           |           | 0.08      | 0.08          | 0.12      | 0.04      |           | 0.20      |           | 0.12          |      |
| <i>Collagen alpha-1(XI) chain</i>               | P12107          | 0.46      | 0.80      | 1.380     |           |           | 0.88          | 0.47      | 1.29      | 3.527     |           |           | 1.76          | 0.57      | 0.67      | 2.176     |           |           | 1.14          | 0.26      | 2.00      | 2.403     |           |           | 1.55          |      |
| <i>Collagen alpha-1(XII) chain</i>              | Q99715          | 1.92      |           |           |           | 1.38      | 1.65          | 2.83      |           |           |           | 2.40      | 2.62          | 1.26      |           |           | 2.15      |           | 1.71          |           |           |           |           |           | ND            |      |
| <i>Collagen alpha-1(XXI) chain</i>              | Q96P44          |           |           |           |           |           | ND            |      |
| <i>Collagen alpha-1(XXIII) chain</i>            | Q86Y22          |           | 0.34      |           |           |           | 0.34          |           | 0.53      |           |           |           | 0.53          |           | 0.62      |           |           |           | 0.62          |           | 1.63      |           |           |           | 1.63          |      |
| <i>Collagen alpha-2(I) chain</i>                | P08123          | 0.28      | 0.29      | 0.336     | 0.14      | 0.17      | 0.24          | 0.61      | 0.54      | 0.532     | 0.26      | 0.49      | 0.49          | 0.30      | 0.57      | 0.369     | 0.28      | 0.76      | 0.46          | 1.50      | 1.29      | 3.215     | 0.77      | 5.58      | 2.47          |      |
| <i>Collagen alpha-2(IX) chain</i>               | Q14055          |           |           |           |           |           | ND            |           |           |           |           |           | ND            |           |           |           |           |           | ND            |           |           | 0.16      |           |           | 0.16          |      |
| <i>Collagen alpha-2(V) chain</i>                | P05997          | 2.38      | 0.90      | 0.765     |           |           | 1.35          | 2.87      | 1.26      | 1.514     |           |           | 1.88          | 1.67      | 0.62      | 2.633     |           |           | 1.64          | 0.28      | 0.26      |           | 0.17      | 0.74      | 0.36          |      |
| <i>Collagen alpha-2(VI) chain</i>               | P12110          | 0.35      | 0.53      | 0.595     | 0.77      | 0.56      | 0.56          | 0.49      | 0.74      | 1.309     | 1.20      | 2.19      | 1.19          | 0.84      | 1.03      | 1.368     | 0.99      | 1.13      | 1.07          | 2.82      | 3.29      | 2.739     | 1.21      | 0.82      | 2.17          |      |
| <i>Collagen alpha-2(XI) chain</i>               | P13942          | 0.60      | 0.92      | 1.178     | 0.85      | 0.84      | 0.88          | 0.71      | 1.20      | 2.001     | 1.52      | 1.11      | 1.31          | 0.75      | 0.54      | 1.247     | 0.80      | 0.46      | 0.76          |           | 2.00      | 0.000     | 0.82      | 5.69      | 2.13          |      |
| <i>Collagen alpha-3(IX) chain</i>               | Q14050          |           |           |           |           | 0.72      | 0.72          |           |           |           | 0.56      |           | 0.56          |           |           |           | 0.26      |           | 0.26          |           |           |           |           |           | ND            |      |
| <i>Collagen alpha-3(VI) chain</i>               | P12111          | 0.36      | 0.53      | 0.478     | 0.59      | 0.47      | 0.48          | 0.47      | 0.64      | 0.900     | 1.03      | 1.84      | 0.97          | 0.64      | 0.91      | 0.872     | 0.71      | 0.97      | 0.82          | 2.33      | 3.10      | 2.741     | 0.62      | 2.08      | 2.17          |      |
| <i>Complement C1q subcomponent subunit A</i>    | P02745          | 1.30      | 1.14      |           |           |           | 1.22          | 2.38      | 7.09      |           |           |           | 4.74          | 1.35      | 1.20      |           |           |           | 1.27          |           |           |           |           |           | ND            |      |
| <i>Complement C1s subcomponent</i>              | P09871          |           |           |           |           |           | ND            |           |           |           |           |           | ND            |           |           |           |           |           | ND            | 0.95      | 0.75      |           |           | 0.27      | 0.66          |      |
| <i>Complement C3</i>                            | P01024          | 0.64      |           | 0.792     | 1.07      | 0.82      | 0.83          | 1.64      |           | 0.877     | 5.28      | 4.38      | 3.04          | 1.48      |           | 2.046     | 1.97      | 3.36      | 2.21          | 7.72      |           |           |           | 0.75      | 4.24          |      |
| <i>Complement C4-A</i>                          | P0C0L4          |           |           |           |           | 0.08      | 0.08          |           |           |           |           | 2.50      | 2.50          |           |           |           |           | 1.55      | 1.55          |           | 1.05      |           |           |           | 1.05          |      |
| <i>Complement factor B</i>                      | P00751          |           |           |           |           | 0.87      | 0.87          |           |           |           |           | 4.66      | 4.66          |           |           |           |           | 3.41      | 3.41          |           |           | 1.57      |           |           | 1.57          |      |
| <i>Complement factor D</i>                      | P00746          | 1.74      | 1.62      | 0.990     |           |           | 1.45          | 1.56      | 2.31      | 1.873     |           |           | 1.92          | 2.47      | 4.10      | 1.612     |           |           | 2.73          |           | 1.70      | 1.837     |           |           | 1.77          |      |
| <i>Complement factor H</i>                      | P08603          |           |           | 2.744     |           | 1.12      | 1.93          |           |           | 2.268     |           | 4.69      | 3.48          |           |           | 1.485     |           | 4.94      | 3.21          |           |           |           |           | 1.54      | 1.54          |      |
| <i>Complement factor H-related protein 1</i>    | Q03591          |           |           |           |           | 1.12      | 1.12          |           |           |           |           | 4.69      | 4.69          |           |           |           |           | 4.94      | 4.94          |           |           |           | 1.54      |           | 1.54          |      |
| <i>Creatine kinase M-type</i>                   | P06732          | 0.72      | 2.97      | 1.440     |           | 1.49      | 1.65          | 3.35      | 7.28      | 4.726     |           | 6.69      | 5.51          | 2.73      | 0.80      | 1.379     |           | 0.47      | 1.34          | 5.04      | 0.46      |           | 0.18      |           | 1.89          |      |
| <i>C-type lectin domain family 11 member A</i>  | Q9Y240          | 1.88      | 1.00      | 0.785     |           | 0.43      | 1.02          | 2.13      | 1.94      | 1.446     |           | 0.68      | 1.55          | 1.53      | 0.60      | 0.748     |           | 1.23      | 1.03          |           | 0.25      | 0.000     | 0.00      |           | 0.08          |      |
| <i>C-type lectin domain family 3 member A</i>   | O75596          | 0.24      | 1.34      | 0.427     | 1.16      | 1.16      | 0.87          | 0.24      | 0.86      | 0.521     | 0.77      | 5.62      | 1.60          | 0.40      | 0.36      | 0.635     | 0.76      | 0.46      | 0.52          | 0.18      | 0.09      | 0.360     | 0.03      | 0.06      | 0.14          |      |
| <i>C-X-C motif chemokine 14</i>                 | O95715          |           |           |           |           |           | ND            |      |
| <i>Cystatin-B</i>                               | P04080          |           |           |           |           |           | ND            |           |           |           |           |           | ND            |           |           |           |           |           | ND            |           |           | 1.949     |           |           | 1.95          |      |
| <i>Cystatin-C</i>                               | P01034          |           |           |           |           |           | ND            |      |
| <i>Cysteine-rich protein 2</i>                  | P52943          |           |           |           |           |           | ND            |           |           |           |           |           | ND            |           |           |           |           |           | ND            | 1.32      |           |           |           |           | 1.32          |      |
| <i>Decorin</i>                                  | P07585          | 0.59      | 0.97      | 0.690     | 0.98      | 1.00      | 0.85          | 0.73      | 0.53      | 0.838     | 0.66      | 1.32      | 0.82          | 1.20      | 1.44      | 1.409     | 1.35      | 0.82      | 1.24          | 1.63      | 1.48      | 2.314     | 0.76      | 1.64      | 1.56          |      |
| <i>Dermatopontin</i>                            | Q07507          |           |           |           |           |           | ND            |           |           |           |           |           | ND            |           |           |           |           |           | ND            |           | 2.18      | 2.39      |           | 1.06      | 3.59          | 2.30 |
| <i>Dextrin</i>                                  | P60981          |           |           |           |           |           | ND            |      |
| <i>Dihydropyrimidinase-related protein 2</i>    | Q16555          |           |           |           |           | 0.26      | 0.26          |           |           |           |           | 0.86      | 0.86          |           |           |           |           | 1.00      | 1.00          |           | 3.03      |           |           |           | 3.03          |      |
| <i>Dihydropyrimidinase-related protein 3</i>    | Q14195          |           |           |           |           |           | ND            |           |           |           |           |           | ND            |           |           |           |           |           | ND            |           | 3.05      |           |           |           | 3.05          |      |
| <b>Protein name</b>                             | <b>Accesion</b> | <b>F7</b> | <b>F6</b> | <b>F3</b> | <b>F9</b> | <b>F2</b> | <b>F-mean</b> | <b>H7</b> | <b>H6</b> | <b>H3</b> | <b>H9</b> | <b>H2</b> | <b>H-mean</b> | <b>K7</b> | <b>K6</b> | <b>K3</b> | <b>K9</b> | <b>K2</b> | <b>K-mean</b> | <b>M7</b> | <b>M6</b> | <b>M3</b> | <b>M9</b> | <b>M2</b> | <b>M-mean</b> |      |



|                                              |          |      |      |       |      |      |        |      |      |       |      |      |        |      |      |       |      |      |        |      |      |       |      |      |        |    |
|----------------------------------------------|----------|------|------|-------|------|------|--------|------|------|-------|------|------|--------|------|------|-------|------|------|--------|------|------|-------|------|------|--------|----|
| Histone H2A type 1                           | P0C0S8   | 0.99 | 0.89 | 1.153 | 1.04 | 0.70 | 0.96   | 1.69 | 1.01 | 1.695 | 1.75 | 1.48 | 1.52   | 1.40 | 0.97 | 1.064 | 1.09 | 1.61 | 1.23   | 1.33 | 0.76 | 0.996 | 1.03 | 0.81 | 0.99   |    |
| Histone H2B type 1-B                         | P33778   | 0.97 |      | 0.805 | 0.93 | 0.60 | 0.83   | 1.33 |      | 1.321 | 1.60 | 1.27 | 1.38   | 1.19 |      | 0.820 | 0.88 | 1.67 | 1.14   | 2.09 |      |       | 1.50 | 1.00 | 1.53   |    |
| Histone H2B type 1-D                         | P58876   | 0.95 | 0.92 | 0.803 | 0.94 |      | 0.90   | 1.30 | 1.62 | 1.326 | 1.61 |      | 1.46   | 1.18 | 1.06 | 0.818 | 0.88 |      | 0.98   | 2.10 |      |       | 1.45 |      | 1.78   |    |
| Histone H2B type 1-K                         | O60814   |      |      |       |      |      | ND     |      |      |       |      |      | ND     |      |      |       |      |      | ND     |      |      | 1.638 |      |      | 1.64   |    |
| Histone H2B type 2-E                         | Q16778   |      |      |       |      |      | ND     |    |
| Histone H3.2                                 | Q71D13   |      |      |       |      |      | ND     |    |
| Histone H3.3                                 | P84243   |      |      |       |      | 0.82 | 0.82   |      |      |       |      | 1.97 | 1.97   |      |      |       |      | 2.11 | 2.11   |      |      |       |      |      | ND     |    |
| Histone H3-like                              | Q6NXT2   | 1.23 | 0.97 | 0.903 |      |      | 1.03   | 1.92 | 1.75 | 1.787 |      |      | 1.82   | 1.92 | 1.48 | 1.478 |      |      | 1.63   | 1.67 | 1.05 | 1.628 | 1.44 |      | 1.45   |    |
| Histone H4                                   | P62805   | 1.05 |      | 1.222 | 1.54 | 0.98 | 1.20   | 1.51 |      | 1.263 | 1.40 | 1.55 | 1.43   | 1.50 |      | 0.921 | 1.09 | 1.49 | 1.25   |      |      |       | 0.59 |      | 0.59   |    |
| Histone-lysine N-methyltransferase MLL3      | Q8NEZ4   | 1.09 |      |       | 1.49 | 1.64 | 1.41   | 0.98 |      |       | 1.73 | 1.53 | 1.41   | 1.78 |      |       | 1.42 | 1.22 | 1.27   |      | 1.11 |       | 0.56 |      | 0.83   |    |
| Homeobox protein Hox-D13                     | P35453   |      |      |       |      |      | ND     |    |
| Homeobox-containing protein 1                | Q6NT76   |      |      | 0.837 |      |      | 0.84   |      |      | 1.577 |      |      | 1.58   |      |      | 0.523 |      |      | 0.52   |      |      |       |      |      | ND     |    |
| Hyaluronan and proteoglycan link protein 1   | P10915   | 2.08 | 2.29 | 1.957 | 2.66 | 2.42 | 2.28   | 1.21 | 1.55 | 1.197 | 1.73 | 0.61 | 1.26   | 1.15 | 1.30 | 0.665 | 0.65 | 0.90 | 0.93   | 0.07 | 0.10 | 0.085 | 0.02 | 0.04 | 0.06   |    |
| Hyaluronan and proteoglycan link protein 4   | Q86UW8   |      |      |       |      |      | ND     |      |      |       |      |      | ND     |      |      |       |      |      | ND     |      |      | 0.265 |      |      | 0.27   |    |
| Ig alpha-1 chain C region                    | P01876   |      |      | 1.886 |      | 0.47 | 1.18   |      |      | 0.999 |      | 2.16 | 1.58   |      |      | 3.724 |      | 2.09 | 2.91   |      |      |       | 1.28 | 1.17 | 1.22   |    |
| Ig gamma-1 chain C region                    | P01857   | 0.25 | 1.13 | 0.943 | 0.44 | 0.41 | 0.63   | 0.67 | 1.92 | 0.946 | 1.36 | 2.28 | 1.43   | 0.57 | 2.03 | 2.271 | 0.98 | 2.04 | 1.58   | 1.44 | 3.29 | 4.392 | 0.88 | 0.99 | 2.20   |    |
| Ig gamma-2 chain C region                    | P01859   | 0.18 | 1.19 | 0.646 | 0.47 | 0.66 | 0.63   | 0.44 | 2.28 | 0.477 | 1.36 | 2.34 | 1.38   | 0.37 | 1.86 | 1.661 | 0.89 | 1.99 | 1.35   | 1.33 | 3.32 |       | 0.45 | 1.01 | 1.53   |    |
| Ig gamma-3 chain C region                    | P01860   |      |      | 1.495 |      | 0.41 | 0.95   |      |      | 0.990 |      | 2.13 | 1.56   |      |      | 1.672 |      | 1.94 | 1.80   |      | 3.46 | ##### | 0.93 | 1.19 | 4.52   |    |
| Ig gamma-4 chain C region                    | P01861   |      |      |       |      |      | ND     |      |      |       |      |      | ND     |      |      |       |      |      | ND     |      |      |       |      | 0.76 | 0.76   |    |
| Ig heavy chain V-I region EU                 | P01742   |      |      |       |      | 0.23 | 0.23   |      |      |       |      | 1.44 | 1.44   |      |      |       |      | 1.41 | 1.41   |      |      |       | 0.64 |      | 0.64   |    |
| Ig heavy chain V-III region WEA              | P01763   |      |      |       |      |      | ND     |    |
| Ig kappa chain C region                      | P01834   | 0.47 | 0.84 | 0.871 | 0.65 | 0.43 | 0.65   | 0.78 | 1.51 | 0.798 | 1.00 | 2.12 | 1.24   | 0.83 | 1.55 | 1.914 | 0.95 | 2.05 | 1.46   | 1.33 | 2.87 | 3.367 | 0.47 | 0.83 | 1.77   |    |
| Ig kappa chain V-III region SIE              | P01620   |      |      |       |      |      | ND     |    |
| Ig lambda chain C regions                    | P01842   | 0.42 | 0.74 | 1.254 | 0.63 | 0.52 | 0.71   | 0.87 | 1.32 | 0.964 | 1.81 | 2.56 | 1.50   | 0.81 | 1.10 | 2.712 | 1.07 | 2.17 | 1.57   |      | 2.58 | 5.117 | 0.94 | 1.05 | 2.42   |    |
| Immunoglobulin superfamily containing leuc   | O14498   |      |      |       |      |      | ND     |    |
| Inhibin beta A chain                         | P08476   |      |      |       |      |      | ND     |      |      |       |      |      | ND     |      |      |       |      |      | ND     |      | 1.33 |       | 0.38 |      | 0.86   |    |
| Insulin-like growth factor-binding protein 7 | Q16270   |      |      |       |      |      | ND     |      |      |       |      |      | ND     |      |      |       |      |      | ND     |      |      |       |      | 0.18 | 0.18   |    |
| Inter-alpha-trypsin inhibitor heavy chain H1 | P19827   |      |      |       |      |      | ND     |      |      |       |      |      | ND     |      |      |       |      |      | ND     |      |      | 5.679 |      |      | 5.68   |    |
| Inter-alpha-trypsin inhibitor heavy chain H5 | Q6UXX5   | 1.60 |      |       |      | 1.02 | 1.31   | 1.36 |      |       | 0.41 |      | 0.88   | 0.84 |      |       | 0.39 | 0.61 | 0.61   |      |      |       |      |      | ND     |    |
| Isocitrate dehydrogenase [NADP] cytoplasmic  | O75874   |      |      |       |      |      | ND     |    |
| Keratin, type II cytoskeletal 1              | P04264   | 1.62 |      |       |      |      | 1.62   | 3.10 |      |       |      |      | 3.10   | 2.05 |      |       |      | 2.05 | 2.05   |      |      |       |      |      | ND     |    |
| Kinesin heavy chain isoform 5A               | Q12840   |      |      | 0.891 |      |      | 0.89   |      |      | 1.403 |      |      | 1.40   |      |      | 1.263 |      |      | 1.26   |      |      |       |      |      | ND     |    |
| Lactadherin                                  | Q08431   | 0.94 | 0.88 | 0.831 | 1.56 | 0.42 | 0.92   | 0.61 | 0.42 | 0.920 | 0.74 | 0.28 | 0.59   | 0.62 | 0.40 | 0.478 | 0.58 | 0.19 | 0.45   | 0.49 | 0.46 | 0.478 | 0.12 | 0.29 | 0.37   |    |
| Lactotransferrin                             | Q02788   |      |      |       |      |      | ND     |      |      |       |      |      | ND     |      |      |       |      |      | ND     |      |      |       | 0.28 |      | 0.28   |    |
| Lambda-crystallin homolog                    | Q9Y2S2   |      |      |       |      |      | ND     |    |
| Lamin-A/C                                    | P02545   | 0.58 | 0.43 |       | 0.36 | 0.48 | 0.46   | 0.84 | 1.20 |       | 1.14 | 1.63 | 1.20   | 0.98 | 0.70 |       | 0.57 | 1.96 | 1.05   | 3.92 | 3.66 | 1.293 | 2.04 |      | 2.73   |    |
| Leucine-rich alpha-2-glycoprotein            | P02750   |      |      |       |      |      | ND     |      |      |       |      |      | ND     |      |      |       |      |      | ND     |      |      |       | 3.07 |      | 3.07   |    |
| Leukocyte cell-derived chemotaxin-2          | O14960   | 1.75 | 1.73 |       | 1.43 | 0.75 | 1.42   | 2.32 | 1.26 |       | 1.53 | 0.75 | 1.46   | 2.32 | 0.92 |       | 0.91 | 0.41 | 1.14   | 0.34 |      |       | 0.07 |      | 0.20   |    |
| Leukocyte elastase                           | P08246   |      |      |       |      |      | ND     |      |      |       |      |      | ND     |      |      |       |      |      | ND     |      | 0.91 |       |      | 0.66 | 0.78   |    |
| L-lactate dehydrogenase A chain              | P00338   | 1.11 | 1.71 | 1.118 | 2.10 | 2.95 | 1.80   | 1.09 | 1.66 | 1.419 | 3.63 | 3.60 | 2.28   | 1.86 | 1.36 | 1.314 | 2.11 | 2.06 | 1.74   | 2.14 | 1.90 |       | 0.36 |      | 1.47   |    |
| L-lactate dehydrogenase B chain              | P07195   |      |      |       |      |      | ND     |      |      |       |      |      | ND     |      |      |       |      |      | ND     |      |      |       |      |      |        | ND |
| Lubricin (proteoglycan 4)                    | Q92954   | 0.96 | 0.40 | 0.600 | 0.40 | 0.18 | 0.51   | 0.43 | 0.37 | 0.477 | 0.26 | 0.13 | 0.33   | 0.39 | 0.26 | 0.483 | 0.48 | 0.18 | 0.36   | 0.45 | 0.29 | 0.633 | 0.14 | 0.08 | 0.32   |    |
| Lumican                                      | P51884   | 0.31 | 0.45 | 0.188 | 0.36 | 0.31 | 0.32   | 0.52 | 0.43 | 0.368 | 0.35 | 0.91 | 0.51   | 1.31 | 1.00 | 0.830 | 1.21 | 0.70 | 1.01   | 1.41 | 1.48 | 2.452 | 0.92 | 1.10 | 1.47   |    |
| Lysozyme C                                   | P61626   | 1.20 | 1.55 | 0.995 | 1.65 | 0.49 | 1.18   | 1.02 | 0.49 | 0.999 | 0.63 | 0.26 | 0.68   | 1.24 | 0.37 | 0.824 | 0.68 | 0.18 | 0.66   | 0.14 | 0.13 | 0.163 | 0.05 | 0.08 | 0.11   |    |
| Malate dehydrogenase, cytoplasmic            | P40925   |      |      |       |      |      | ND     |    |
| Malate dehydrogenase, mitochondrial          | P40926   |      |      |       |      |      | ND     |      |      |       |      |      | ND     |      |      |       |      |      | ND     |      |      |       | 1.18 |      | 1.18   |    |
| Matrilin-3                                   | O15232   |      | 1.85 | 1.140 | 1.49 | 1.36 | 1.46   |      | 0.85 | 0.540 | 0.21 | 0.55 | 0.54   |      | 1.64 | 0.783 | 0.32 | 0.33 | 0.77   |      |      | 0.167 | 0.03 |      | 0.10   |    |
| Matrix Gla protein                           | P08493   |      |      |       |      |      | ND     |    |
| Melanoma-derived growth regulatory protei    | Q16674   |      |      |       |      |      | ND     |    |
| Melanotransferrin                            | P08582   |      |      |       |      |      | ND     |      |      |       |      |      | ND     |      |      |       |      |      | ND     |      |      | 0.25  |      |      | 0.25   |    |
| Microfibril-associated glycoprotein 4        | P55083   |      |      |       |      |      | ND     |      |      |       |      |      | ND     |      |      |       |      |      | ND     |      | 2.52 |       |      | 0.54 | 1.53   |    |
| Mimectan                                     | P20774   | 0.36 | 0.37 | 0.253 | 0.22 | 0.62 | 0.37   | 0.49 | 0.59 | 0.682 | 0.71 | 2.79 | 1.05   | 1.42 | 1.66 | 1.344 | 1.45 | 1.75 | 1.52   | 1.83 | 2.24 | 3.606 | 0.96 | 3.10 | 2.35   |    |
| Mitofusin-1                                  | Q8IWA4   |      |      |       |      |      | ND     |      |      |       |      |      | ND     |      |      |       |      |      | ND     |      |      | 0.19  |      |      | 0.19   |    |
| Moesin                                       | P26038   |      |      | 1.464 | 1.39 | 0.92 | 1.26   |      |      | 1.956 | 1.84 | 1.91 | 1.90   |      |      | 1.401 | 1.03 | 1.37 | 1.27   |      | 1.76 |       | 0.57 |      | 1.17   |    |
| Myeloblastin                                 | P24158   |      |      |       |      |      | ND     |      |      |       |      |      | ND     |      |      |       |      |      | ND     |      |      |       |      |      | 1.76   |    |
| Myocilin                                     | Q99972   |      |      |       |      |      | ND     |      |      |       |      |      | ND     |      |      |       |      |      | ND     |      | 6.05 |       |      | 0.92 | 3.49   |    |
| Protein name                                 | Accesion | F7   | F6   | F3    | F9   | F2   | F-mean | H7   | H6   | H3    | H9   | H2   | H-mean | K7   | K6   | K3    | K9   | K2   | K-mean | M7   | M6   | M3    | M9   | M2   | M-mean |    |

|                                               |           |      |      |       |       |      |        |      |      |       |      |       |        |      |      |       |      |      |        |      |       |       |      |      |        |      |      |
|-----------------------------------------------|-----------|------|------|-------|-------|------|--------|------|------|-------|------|-------|--------|------|------|-------|------|------|--------|------|-------|-------|------|------|--------|------|------|
| Myoglobin                                     | P02144    | 0.40 |      | 0.954 |       | 2.13 | 1.16   | 2.36 |      | 2.663 |      | 11.90 | 5.64   | 1.38 |      | 0.677 |      | 0.41 | 0.82   |      |       |       |      |      | ND     |      |      |
| Myosin light polypeptide 6                    | P60660    |      |      |       |       |      | ND     |      |      |       |      |       | ND     |      |      |       |      |      | ND     |      |       |       |      |      |        | ND   |      |
| Myosin-2                                      | Q9UKX2    |      |      |       |       |      | ND     |      |      |       |      |       | ND     |      |      |       |      |      | ND     |      |       |       |      |      |        | ND   |      |
| Myosin-7                                      | P12883    |      |      |       |       |      | ND     |      |      |       |      |       | ND     |      |      |       |      |      | ND     |      |       |       |      |      |        | ND   |      |
| Nesprin-2                                     | Q8WXH0    |      |      |       |       |      | ND     |      |      |       |      |       | ND     |      |      |       |      |      | ND     |      |       |       |      | 1.23 |        | 1.23 |      |
| Neuroblast differentiation-associated protein | Q09666    | 0.82 | 0.99 | 0.516 |       |      | 0.77   | 1.40 | 1.13 | 1.356 |      |       | 1.30   | 1.12 | 0.95 | 1.179 |      |      | 1.08   | 3.91 |       |       | 2.74 |      |        | 3.33 |      |
| Neuron navigator 3                            | Q8IVL0    | 0.25 |      |       | 0.00  | 0.41 | 0.22   | 0.63 |      |       | 0.30 | 0.80  | 0.58   | 1.05 |      | 0.71  | 0.80 |      | 0.85   | 1.07 | 1.29  |       | 1.01 |      |        | 1.12 |      |
| Nidogen-2                                     | Q14112    |      |      |       |       |      | ND     |      |      |       |      |       | ND     |      |      |       |      |      | ND     |      |       |       |      |      |        | ND   |      |
| Nucleoside diphosphate kinase A               | P15531    |      |      |       |       |      | ND     |      |      |       |      |       | ND     |      |      |       |      |      | ND     |      |       |       |      |      |        | ND   |      |
| Nucleoside diphosphate kinase B               | P22392    |      |      |       |       |      | ND     |      |      |       |      |       | ND     |      |      |       |      |      | ND     |      |       |       |      |      |        | ND   |      |
| Osteomodulin                                  | Q99983    | 0.57 | 2.01 | 1.762 | 1.58  | 2.17 | 1.62   | 0.70 | 1.17 | 1.582 | 1.16 | 3.07  | 1.53   | 1.11 | 2.01 | 1.990 | 1.87 | 1.38 | 1.67   | 0.41 | 0.45  |       |      | 0.22 |        | 0.36 |      |
| Peptidyl-prolyl cis-trans isomerase A         | P62937    | 1.00 | 1.18 |       | 0.84  | 0.99 | 1.00   | 1.44 | 1.30 |       | 1.63 | 2.19  | 1.64   | 1.33 | 1.02 |       | 0.82 | 1.66 | 1.21   | 2.11 | 1.29  |       | 0.61 | 0.42 |        | 1.10 |      |
| Peptidyl-prolyl cis-trans isomerase B         | P23284    | 0.65 | 1.19 | 0.798 |       | 0.80 | 0.86   | 0.82 | 1.00 | 0.688 |      | 1.50  | 1.00   | 0.92 | 0.84 | 0.609 |      | 1.06 | 0.86   |      | 1.12  |       |      |      |        | 1.12 |      |
| Peptidyl-prolyl cis-trans isomerase C         | P45877    |      |      |       | 1.75  |      | 1.75   |      |      |       | 0.94 |       | 0.94   |      |      | 0.71  |      |      | 0.71   |      |       |       | 0.19 |      |        | 0.19 |      |
| Peroxiredoxin-1                               | Q06830    |      | 1.41 | 1.118 | 1.26  | 0.75 | 1.13   |      | 1.43 | 1.411 | 1.72 | 1.02  | 1.40   |      | 1.34 | 1.118 | 1.25 | 0.90 | 1.15   | 1.49 | 0.76  | 1.658 | 0.58 |      |        | 1.12 |      |
| Peroxiredoxin-2                               | P32119    | 0.72 | 0.99 | 1.559 | 1.09  | 0.61 | 0.99   | 2.15 | 1.50 | 1.269 | 2.83 | 1.18  | 1.79   | 2.36 | 1.09 | 2.265 | 0.84 | 1.10 | 1.53   | 2.87 | 2.04  | 1.933 | 0.38 | 0.74 |        | 1.59 |      |
| Peroxiredoxin-4                               | Q13162    |      |      |       |       | 0.84 | 0.84   |      |      |       |      | 1.75  | 1.15   |      |      |       | 1.22 |      | 1.22   |      |       |       |      |      |        | ND   |      |
| Peroxiredoxin-5, mitochondrial                | P30044    |      |      |       |       | 1.77 | 1.77   |      |      |       |      | 4.58  | 4.58   |      |      |       | 3.41 |      | 3.41   |      |       |       |      |      |        | ND   |      |
| Peroxiredoxin-6                               | P30041    | 1.14 |      |       |       | 0.87 | 1.00   | 1.76 |      |       |      | 1.60  | 1.68   | 2.50 |      |       |      | 0.86 | 1.68   |      |       |       |      |      |        | ND   |      |
| Phosphatidylethanolamine-binding protein      | P30086    | 0.94 |      |       | 0.76  | 0.68 | 0.79   | 1.29 |      |       | 1.58 | 1.40  | 1.42   | 1.17 |      | 0.72  | 0.79 |      | 0.89   |      |       |       |      |      |        | ND   |      |
| Phosphoglycerate kinase 1                     | P00558    | 1.11 | 1.69 | 1.532 | 1.61  | 1.49 | 1.48   | 1.46 | 2.03 | 1.600 | 2.04 | 1.60  | 1.74   | 2.48 | 1.76 | 1.559 | 1.38 | 1.21 | 1.68   | 1.42 | 1.43  |       | 0.59 |      |        | 1.15 |      |
| Phosphoglycerate mutase 1                     | P18669    | 1.11 | 1.88 | 1.179 | 1.71  |      | 1.47   | 1.55 | 1.80 | 0.902 | 1.90 |       | 1.54   | 2.04 | 1.70 | 0.666 | 1.17 |      | 1.39   |      |       |       |      |      |        | ND   |      |
| Phosphoglycerate mutase 2                     | P15259    |      |      |       |       |      | ND     |      |      |       |      |       | ND     |      |      |       |      |      | ND     |      |       |       |      |      |        | 2.10 | 2.10 |
| Phospholipase A2, membrane associated         | P14555    | 8.21 | 3.86 | 5.303 | 13.51 | 3.21 | 6.82   | 3.47 | 1.02 | 3.650 | 2.98 | 1.93  | 2.61   | 7.72 | 2.99 | 4.208 | 9.02 | 0.91 | 4.97   | 0.14 | 0.12  | 0.162 | 0.22 | 0.06 |        | 0.14 |      |
| Pigment epithelium-derived factor             | P36955    | 1.04 | 1.06 | 0.000 | 0.59  | 0.69 | 0.68   | 1.72 | 1.68 | 1.463 | 1.33 | 3.54  | 1.94   | 1.46 | 1.36 | 1.379 | 0.88 | 3.39 | 1.69   | 1.99 |       |       |      |      |        | 1.99 |      |
| Plasma protease C1 inhibitor                  | P05155    |      |      |       |       |      | ND     |      |      |       |      |       | ND     |      |      |       |      |      | ND     |      | 2.03  | 1.05  |      | 0.49 | 0.53   |      | 1.03 |
| Plasma serine protease inhibitor              | P05154    |      |      |       |       |      | ND     |      |      |       |      |       | ND     |      |      |       |      |      | ND     |      | 0.52  | 0.53  |      | 0.12 | 0.37   |      | 0.39 |
| Plasminogen activator inhibitor 1             | P05121    |      |      |       |       |      | ND     |      |      |       |      |       | ND     |      |      |       |      |      | ND     |      |       | 0.39  |      | 0.00 |        |      | 0.20 |
| Plasminogen                                   | P00747    |      |      |       |       | 0.23 | 0.23   |      |      |       |      | 4.28  | 4.28   |      |      |       | 6.64 |      | 6.64   |      |       |       | 2.95 | 1.53 |        |      | 2.24 |
| Pleckstrin homology domain-containing family  | Q9Y2H5    | 7.05 | 3.05 | 3.981 | 7.80  |      | 5.47   | 2.78 | 0.66 | 3.033 | 1.49 |       | 1.99   | 5.81 | 1.85 | 3.372 | 5.23 |      | 4.06   | 0.13 | 0.08  |       |      |      |        | 0.10 |      |
| Pleiotrophin                                  | P21246    |      |      |       |       |      | ND     |      |      |       |      |       | ND     |      |      |       |      |      | ND     |      |       |       |      |      |        |      | ND   |
| Plexin domain-containing protein 2            | Q6UX71    |      |      |       |       |      | ND     |      |      |       |      |       | ND     |      |      |       |      |      | ND     |      | 0.53  |       | 0.25 |      |        |      | 0.39 |
| Polymerase I and transcript release factor    | Q6NZI2    |      |      | 0.654 |       | 4.23 | 2.44   |      |      | 1.100 |      | 1.11  | 1.10   |      |      | 0.988 |      | 1.01 | 1.00   | 1.67 |       |       | 1.61 |      |        | 1.64 |      |
| Probable serine protease HTRA3                | P83110    |      |      |       |       |      | ND     |      |      |       |      |       | ND     |      |      |       |      |      | ND     |      |       |       | 0.47 |      |        |      | 0.47 |
| Procollagen C-endopeptidase enhancer 1        | Q15113    | 1.34 |      | 0.838 |       | 1.10 | 1.09   | 1.65 |      | 1.117 |      | 3.25  | 2.00   | 0.00 |      | 1.049 |      | 2.43 | 1.16   | 3.80 |       |       |      | 4.24 |        | 4.02 |      |
| Procollagen C-endopeptidase enhancer 2        | Q9UKZ9    | 0.71 | 1.27 | 1.296 | 2.28  | 1.49 | 1.41   | 1.08 | 1.21 | 1.732 | 2.32 | 0.74  | 1.42   | 0.88 | 1.53 | 1.687 | 3.02 | 0.67 | 1.56   | 0.99 |       |       | 0.28 | 4.24 |        | 1.84 |      |
| Profilin-1                                    | P07737    |      |      |       |       |      | ND     |      |      |       |      |       | ND     |      |      |       |      |      | ND     |      |       |       |      |      |        |      | ND   |
| Prolargin                                     | P51888    | 1.22 | 1.03 | 0.986 | 0.94  | 0.87 | 1.01   | 1.36 | 1.21 | 1.422 | 1.41 | 0.96  | 1.27   | 1.49 | 1.14 | 1.286 | 1.06 | 1.08 | 1.21   | 1.57 | 1.13  | 1.679 | 0.77 | 1.06 |        | 1.24 |      |
| Protein disulfide-isomerase A3                | P30101    |      | 1.36 |       |       |      | 1.36   |      | 2.41 |       |      |       | 2.41   |      | 1.55 |       |      |      | 1.55   |      |       |       | 1.68 |      |        |      | 1.68 |
| Protein disulfide-isomerase                   | P07237    | 1.06 | 1.07 | 1.632 | 1.59  | 1.25 | 1.32   | 1.01 | 1.32 | 1.119 | 1.04 | 3.21  | 1.54   | 1.50 | 1.21 | 0.891 | 1.24 | 1.51 | 1.27   | 1.57 | 1.22  |       | 1.04 | 0.00 |        | 0.96 |      |
| Protein FAM59B                                | Q75VX8    |      |      |       |       | 1.20 | 1.20   |      |      |       |      | 1.32  | 1.32   |      |      |       | 1.19 |      | 1.19   |      |       |       |      |      |        |      | ND   |
| Protein piccolo                               | Q9Y6V0    |      |      |       |       |      | ND     |      |      |       |      |       | ND     |      |      |       |      |      | ND     |      |       |       |      |      |        |      | ND   |
| Protein S100-A1                               | P23297    |      | 5.23 |       | 2.64  | 2.81 | 3.56   |      | 4.49 |       | 4.56 | 2.05  | 3.70   |      | 3.38 |       | 2.49 | 1.79 | 2.55   |      |       |       |      | 1.11 |        | 1.11 |      |
| Protein S100-A4                               | P26447    |      |      |       |       | 0.39 | 0.39   |      |      |       |      | 2.79  | 2.19   |      |      |       | 1.54 |      | 1.54   |      | 2.01  |       | 1.73 |      |        | 1.87 |      |
| Protein S100-A6                               | P06703    |      |      |       |       | 0.78 | 0.78   |      |      |       |      | 1.81  | 1.81   |      |      |       | 1.69 |      | 1.69   |      |       |       |      |      |        |      | ND   |
| Protein S100-A8                               | P05109    |      |      |       |       |      | ND     |      |      |       |      |       | ND     |      |      |       |      |      | ND     |      |       |       |      |      |        |      | ND   |
| Protein S100-A9                               | P06702    | 0.29 | 0.35 | 1.096 | 1.37  | 0.31 | 0.68   | 1.39 | 1.20 | 0.310 | 1.34 | 0.77  | 1.00   | 0.74 | 0.17 | 0.256 | 0.36 | 0.87 | 0.48   | 0.97 | 0.30  | 0.575 | 0.49 | 0.72 |        | 0.61 |      |
| Protein S100-B                                | P04271    | 1.01 | 2.29 | 1.569 | 2.21  | 0.86 | 1.59   | 1.47 | 3.06 | 1.654 | 4.48 | 0.86  | 2.31   | 1.46 | 1.51 | 0.944 | 1.23 | 0.63 | 1.15   | 0.62 | 0.000 | 0.04  | 0.00 |      |        | 0.16 |      |
| Protein transport protein Sec16B              | Q96JE7    |      |      |       | 1.53  | 2.50 | 2.02   |      |      |       | 3.61 | 2.20  | 2.91   |      |      |       | 0.97 | 1.34 | 1.16   |      |       |       |      |      |        | ND   |      |
| Prothrombin                                   | P00734    |      |      |       |       | 0.82 | 0.82   |      |      |       |      | 3.26  | 3.26   |      |      |       | 4.13 |      | 4.13   |      |       |       |      |      |        |      | ND   |
| Putative annexin A2-like protein              | A6NMY6    |      | 0.98 |       |       |      | 0.98   |      | 1.85 |       |      |       | 1.85   |      | 1.37 |       |      |      | 1.37   |      |       |       |      |      |        |      | ND   |
| Putative elongation factor 1-alpha-like 3     | Q5VTE0    | 0.71 | 1.19 |       | 2.62  | 0.62 | 1.28   | 1.44 | 2.00 |       | 1.29 | 2.04  | 1.69   | 1.27 | 1.57 |       | 1.33 | 1.22 | 1.35   |      | 0.98  |       |      |      |        | 0.98 |      |
| Putative endoplasmic reticulum protein        | Q58FF3    |      |      |       |       |      | ND     |      |      |       |      |       | ND     |      |      |       |      |      | ND     |      |       |       |      |      |        |      | ND   |
| Putative V-set and immunoglobulin domain      | A6NJS3    |      |      |       | 0.19  |      | 0.19   |      |      |       | 1.23 |       | 1.23   |      |      |       | 0.89 |      | 0.89   |      |       | 3.103 |      |      |        |      | 3.10 |
| Pyruvate kinase isozymes M1/M2                | P14618    | 0.76 | 1.31 | 1.015 | 1.30  | 0.89 | 1.06   | 0.94 | 1.68 | 1.199 | 1.64 | 1.16  | 1.32   | 1.32 | 1.45 | 1.130 | 1.24 | 0.98 | 1.22   | 1.19 | 1.10  | 0.804 | 0.44 | 0.65 |        | 0.84 |      |
| Quinone oxidoreductase                        | Q08257    | 1.33 |      |       |       |      | 1.33   | 0.86 |      |       |      |       | 0.86   |      |      |       |      |      | 1.36   |      |       |       |      |      |        |      | ND   |
| Protein name                                  | Accession | F7   | F6   | F3    | F9    | F2   | F-mean | H7   | H6   | H3    | H9   | H2    | H-mean | K7   | K6   | K3    | K9   | K2   | K-mean | M7   | M6    | M3    | M9   | M2   | M-mean |      |      |





|                                  |                  |           |           |           |           |           |               |           |           |           |           |           |               |           |           |           |           |           |               |           |           |           |           |           |               |
|----------------------------------|------------------|-----------|-----------|-----------|-----------|-----------|---------------|-----------|-----------|-----------|-----------|-----------|---------------|-----------|-----------|-----------|-----------|-----------|---------------|-----------|-----------|-----------|-----------|-----------|---------------|
| <i>Versican core protein</i>     | P13611           | 0.15      | 0.34      | 0.22      | 0.27      | 0.24      | 0.19          | 0.27      | 0.14      | 0.20      | 0.20      | 0.20      | 0.52          | 0.39      | 0.16      | 0.32      | 1.45      | 2.56      | 2.082         | 0.88      | 0.50      | 1.49      |           |           |               |
| <i>Vimentin</i>                  | P08670           | 0.47      | 0.62      | 0.469     | 0.45      | 0.31      | 0.46          | 0.80      | 0.98      | 0.913     | 0.92      | 1.18      | 0.96          | 1.10      | 1.09      | 0.943     | 0.82      | 1.19      | 1.03          | 2.23      | 2.15      | 1.686     | 1.17      | 0.90      | 1.63          |
| <i>Vitamin D-binding protein</i> | P02774           |           |           |           |           | 1.30      | 1.30          |           |           |           | 3.51      | 3.51      |               |           |           | 3.92      | 3.92      | 12.87     |               | 4.31      | 1.89      | 6.35      |           |           |               |
| <i>Vitrin</i>                    | Q6UXI7           | 6.68      | 2.24      |           | 0.73      | 3.22      | 3.22          | 12.13     | 10.39     |           | 11.54     | 11.35     | 2.60          | 1.21      |           | 1.51      | 1.77      |           |               |           |           | ND        |           |           |               |
| <i>Vitronectin</i>               | P04004           | 1.53      |           | 1.033     |           | 0.59      | 1.05          | 2.15      |           | 1.136     |           | 1.55      | 1.40          |           | 2.345     | 2.84      | 2.19      | 5.67      | 2.72          | 7.664     | 2.38      | 1.90      | 4.07      |           |               |
| <i>Zinc-alpha-2-glycoprotein</i> | P25311           |           |           |           |           |           | ND            |           |           |           |           | ND        |               |           |           |           | ND        |           |               |           |           | 2.90      |           |           |               |
| <b>Protein name</b>              | <b>Accession</b> | <b>F7</b> | <b>F6</b> | <b>F3</b> | <b>F9</b> | <b>F2</b> | <b>F-mean</b> | <b>H7</b> | <b>H6</b> | <b>H3</b> | <b>H9</b> | <b>H2</b> | <b>H-mean</b> | <b>K7</b> | <b>K6</b> | <b>K3</b> | <b>K9</b> | <b>K2</b> | <b>K-mean</b> | <b>M7</b> | <b>M6</b> | <b>M3</b> | <b>M9</b> | <b>M2</b> | <b>M-mean</b> |

Supplemental table 1 continued

| Protein name                                          | Accession | AF7  | AF6  | AF3   | AF9  | AF2  | AF-mean | NP7  | NP6  | NP3   | NP9  | NP2   | NP-mean | R (A) | R (B) | R (C) | R (D) | R (E) | R (F) | R-mean | T (A) | T (B) | T (C) | T (D) | T (E) | T (F) | T-mean |      |
|-------------------------------------------------------|-----------|------|------|-------|------|------|---------|------|------|-------|------|-------|---------|-------|-------|-------|-------|-------|-------|--------|-------|-------|-------|-------|-------|-------|--------|------|
| 14-3-3 protein eta                                    | Q04917    |      |      |       |      |      | ND      |      |      |       |      |       | ND      | 1.44  |       |       |       |       |       | 1.44   |       |       | 2.92  | 2.99  |       |       |        | 2.96 |
| 14-3-3 protein gamma                                  | P61981    | 0.93 | 0.65 |       |      |      | 0.79    | 0.52 | 0.68 |       |      |       | 0.60    |       |       |       |       |       |       | ND     |       |       |       |       |       |       |        | ND   |
| 14-3-3 protein theta                                  | P27348    |      |      |       |      |      | ND      |      |      |       |      |       | ND      |       |       |       | 1.27  |       |       | 1.27   |       |       |       |       | 0.52  | 1.21  |        | 0.86 |
| 14-3-3 protein zeta/delta                             | P63104    |      |      |       |      |      | ND      |      |      |       |      |       | ND      |       |       |       | 1.26  |       |       | 1.26   |       |       |       |       | 0.50  | 1.18  |        | 0.84 |
| 1-phosphatidylinositol-4,5-bisphosphate phosphatase 2 | P51178    |      |      |       |      |      | ND      |      |      |       |      |       | ND      | 1.42  |       |       | 3.14  | 1.65  | 1.23  | 1.86   |       | 4.07  | 3.27  | 3.12  | 1.41  | 2.24  |        | 2.82 |
| 40S ribosomal protein S20                             | P60866    |      |      |       |      |      | ND      |      |      |       |      |       | ND      |       |       |       |       |       |       | ND     |       |       |       |       |       |       |        | ND   |
| 4-trimethylaminobutylaldehyde dehydrogenase           | P49189    |      |      |       |      |      | ND      |      |      |       |      |       | ND      |       | 1.00  | 1.37  |       |       |       | 1.18   | 4.66  |       |       |       |       |       |        | 4.66 |
| 78 kDa glucose-regulated protein                      | P11021    | 1.56 |      |       |      |      | 1.56    | 1.63 |      |       |      |       | 1.63    |       | 0.84  | 0.94  |       |       |       | 0.89   | 2.65  |       |       |       |       |       |        | 2.65 |
| Actin, alpha cardiac muscle 1                         | P68032    |      |      |       |      |      | ND      |      |      |       |      |       | ND      |       |       |       | 2.27  | 1.66  | 0.87  | 1.60   |       |       | 2.48  | 3.22  | 2.60  |       | 2.77   |      |
| Actin, aortic smooth muscle                           | P62736    |      |      |       |      |      | ND      |      |      |       |      |       | ND      |       |       |       |       |       |       | ND     |       |       |       |       |       |       |        | ND   |
| Actin, cytoplasmic 1                                  | P60709    | 0.97 | 0.58 | 0.592 | 0.38 | 1.24 | 0.75    | 0.85 | 0.83 | 0.616 | 0.51 | 1.57  | 0.87    | 1.63  | 1.03  | 1.24  | 2.24  | 1.72  | 0.84  | 1.45   | 4.59  | 3.03  | 3.14  | 2.40  | 3.18  | 2.63  |        | 3.16 |
| Adenomatous polyposis coli protein 2                  | O95996    |      |      | 1.230 |      | 1.22 | 1.23    |      |      | 0.936 |      | 1.80  | 1.37    |       |       |       |       |       |       | ND     |       |       |       |       |       |       |        | ND   |
| Adenylate kinase isoenzyme 1                          | P00568    |      |      |       |      |      | ND      |      |      |       |      |       | ND      | 4.81  |       |       |       |       |       | 4.81   |       | 9.04  | 9.22  |       |       |       |        | 9.13 |
| Adenylyl cyclase-associated protein 1                 | Q01518    |      |      |       |      |      | ND      |      |      |       |      |       | ND      |       | 1.47  | 1.42  |       |       |       | 1.44   | 2.79  |       |       |       |       |       |        | 2.79 |
| Adipocyte enhancer-binding protein 1                  | Q8IUX7    |      |      |       |      |      | ND      |      |      |       |      |       | ND      |       |       |       |       |       |       | ND     |       |       |       |       |       |       |        | ND   |
| Adseverin                                             | Q9Y6U3    |      |      |       |      |      | ND      |      |      |       |      |       | ND      | 1.22  |       |       | 4.56  |       |       | 2.89   |       | 5.51  | 5.05  |       | 1.04  | 4.17  |        | 3.94 |
| Aggrecan core protein                                 | P16112    | 1.55 | 1.50 | 1.119 | 1.08 | 0.84 | 1.22    | 1.01 | 1.19 | 0.773 | 1.08 | 1.10  | 1.03    | 1.12  | 1.70  | 1.80  | 0.91  | 1.16  | 1.10  | 1.30   | 1.16  | 1.40  | 1.26  | 1.00  | 0.88  | 1.11  |        | 1.14 |
| Alcohol dehydrogenase [NADP+]                         | P14550    |      |      | 1.651 |      |      | 1.65    |      |      | 1.053 |      |       | 1.05    | 0.84  | 0.56  | 0.65  | 1.76  | 1.10  | 0.96  | 0.98   | 1.21  | 1.62  | 1.46  | 1.94  | 1.08  | 2.24  |        | 1.59 |
| Alcohol dehydrogenase 1B                              | P00325    |      | 0.56 |       |      |      | 0.56    |      | 0.34 |       |      |       | 0.34    |       |       |       | 2.26  |       |       | 2.26   |       |       |       | 1.18  | 1.69  |       |        | 1.44 |
| Alpha-1-acid glycoprotein 1                           | P02763    | 1.03 | 0.91 | 0.840 | 1.39 | 1.81 | 1.19    | 0.82 | 0.61 | 0.940 | 0.88 | 7.57  | 2.16    | 0.52  | 0.60  | 0.42  | 0.36  | 0.59  | 0.49  | 0.50   | 0.83  | 0.81  | 0.65  | 0.54  | 0.57  | 0.36  |        | 0.63 |
| Alpha-1-antichymotrypsin                              | P01011    | 0.98 |      | 1.203 | 0.88 | 1.22 | 1.07    | 0.95 |      | 1.609 | 0.91 | 10.21 | 3.42    |       |       |       | 0.57  |       |       | 0.57   |       |       |       |       | 0.25  | 0.72  |        | 0.48 |
| Alpha-1-antitrypsin                                   | P01009    | 1.11 | 1.17 | 1.136 | 0.74 | 0.81 | 0.99    | 1.21 | 2.11 | 1.289 | 1.34 | 5.29  | 2.25    | 0.69  | 1.41  | 1.05  | 0.39  | 3.32  | 1.59  | 1.41   | 0.82  | 0.52  | 0.68  | 0.49  | 0.96  | 0.54  |        | 0.67 |
| Alpha-1B-glycoprotein                                 | P04217    |      |      |       | 0.84 | 1.81 | 1.32    |      |      |       | 0.70 | 7.57  | 4.14    |       |       |       |       |       |       | ND     |       |       |       |       |       |       |        | ND   |
| Alpha-2-HS-glycoprotein                               | P02765    | 1.16 |      |       | 0.40 | 2.03 | 1.19    | 0.60 |      |       | 0.24 | 8.09  | 2.98    |       |       |       |       |       |       | ND     |       |       |       |       |       |       |        | ND   |
| Alpha-2-macroglobulin                                 | P01023    | 0.50 | 0.26 | 0.259 | 0.13 | 0.25 | 0.28    | 0.81 | 0.65 | 0.658 | 0.20 | 0.81  | 0.62    | 3.01  | 3.01  | 6.07  | 0.82  | 3.78  | 2.98  | 3.28   | 1.57  | 2.81  | 2.47  | 1.00  | 2.70  | 2.17  |        | 2.12 |
| Alpha-actinin-1                                       | P12814    |      |      |       |      |      | ND      |      |      |       |      |       | ND      | 1.71  | 0.89  | 1.43  | 2.75  |       |       | 1.70   | 4.47  | 4.92  | 4.49  |       | 0.00  | 1.44  |        | 3.06 |
| Alpha-crystallin B chain                              | P02511    |      |      | 0.568 | 0.66 |      | 0.61    |      |      | 0.466 | 0.33 |       | 0.40    |       |       |       |       |       |       | ND     |       |       |       |       |       |       |        | ND   |
| Alpha-enolase                                         | P06733    | 1.02 | 0.94 | 0.694 | 0.57 | 0.82 | 0.81    | 0.60 | 0.76 | 1.055 | 0.30 | 1.04  | 0.75    | 1.41  | 0.96  | 1.52  | 1.74  | 0.65  | 0.83  | 1.19   | 2.69  | 2.38  | 2.30  | 1.84  | 0.78  | 1.85  |        | 1.97 |
| Angiogenin                                            | P03950    | 3.68 | 3.41 | 2.528 | 6.08 | 2.53 | 3.65    | 4.08 | 2.88 | 2.477 | 5.24 | 2.28  | 3.39    | 3.97  | 1.50  | 1.86  | 3.17  | 4.89  | 2.38  | 2.96   | 2.66  | 1.29  | 1.52  | 3.60  | 2.58  | 1.63  |        | 2.21 |
| Angiopoietin-related protein 2                        | Q9UKU9    |      | 1.77 |       | 1.18 |      | 1.47    |      | 1.07 |       | 0.53 |       | 0.80    | 0.72  |       |       | 0.32  |       |       | 0.52   |       | 1.21  | 1.09  |       | 0.47  | 0.45  |        | 0.81 |
| Angiopoietin-related protein 7                        | O43827    | 1.11 |      |       |      |      | 1.11    | 0.64 |      |       |      |       | 0.64    |       | 3.37  | 4.82  |       | 0.31  | 1.95  | 2.61   | 1.36  |       |       | 0.32  |       |       |        | 0.84 |
| Annexin A1                                            | P04083    | 1.15 | 0.70 |       | 0.46 |      | 0.77    | 0.71 | 0.71 |       | 0.28 |       | 0.57    | 0.83  | 1.16  | 1.46  | 1.30  | 0.30  | 0.44  | 0.92   | 2.32  | 2.81  | 2.46  | 1.41  | 1.19  | 1.92  |        | 2.02 |
| Annexin A2                                            | P07355    | 0.89 | 0.65 |       | 0.46 |      | 0.67    | 0.57 | 0.56 |       | 0.32 |       | 0.48    | 0.65  | 1.04  | 1.41  | 1.71  |       |       | 1.20   | 2.92  | 2.07  | 2.23  |       | 1.23  | 1.55  |        | 2.00 |
| Annexin A5                                            | P08758    | 0.67 | 0.28 |       | 0.39 |      | 0.45    | 0.43 | 0.36 |       | 0.34 |       | 0.38    | 0.88  | 0.78  | 1.17  | 1.96  | 0.89  | 1.03  | 1.12   | 4.22  | 4.14  | 3.83  | 2.48  | 0.64  | 3.73  |        | 3.17 |
| Annexin A6                                            | P08133    | 1.02 |      |       | 0.54 |      | 0.78    | 0.43 |      |       | 0.40 |       | 0.42    | 0.96  | 1.09  | 1.35  | 3.08  | 0.70  | 0.71  | 1.32   | 4.61  | 3.68  | 4.02  | 2.63  | 1.59  | 2.72  |        | 3.21 |
| Antithrombin-III                                      | P01008    |      |      |       | 1.14 |      | 1.14    |      |      |       | 0.38 |       | 0.38    |       |       |       |       |       |       | ND     |       |       |       |       |       |       |        | ND   |
| Apolipoprotein A-I                                    | P02647    | 0.81 | 0.42 | 0.245 | 0.47 | 1.06 | 0.60    | 0.36 | 0.25 | 0.000 | 0.13 | 5.93  | 1.33    |       | 0.60  | 0.51  | 0.59  |       |       | 0.57   | 2.19  |       |       |       | 0.85  | 1.05  |        | 1.36 |
| Apolipoprotein D                                      | P05090    | 4.65 | 1.17 | 1.429 | 2.57 | 1.24 | 2.21    | 6.66 | 2.76 | 2.289 | 4.64 | 18.60 | 6.99    |       |       |       | 0.51  | 6.98  | 3.11  | 3.53   |       |       |       | 0.64  | 3.58  | 1.45  |        | 1.89 |
| Argininosuccinate synthase                            | P00966    |      |      |       |      |      | ND      |      |      |       |      |       | ND      | 0.69  |       |       |       |       |       | 0.69   |       | 3.05  | 3.37  |       |       |       |        | 3.21 |
| Asporin                                               | Q9BXN1    | 0.56 | 0.27 | 0.586 | 0.18 | 0.21 | 0.36    | 0.44 | 0.30 | 0.547 | 0.27 | 0.36  | 0.38    | 0.13  | 0.12  | 0.15  | 0.10  | 0.16  | 0.11  | 0.13   | 0.26  | 0.13  | 0.18  | 0.11  | 0.14  | 0.15  |        | 0.16 |
| ATP synthase subunit beta, mitochondrial              | P06576    |      |      |       |      |      | ND      |      |      |       |      |       | ND      |       | 0.89  | 0.83  | 1.23  |       |       | 0.98   | 3.71  |       |       |       | 1.36  | 1.47  |        | 2.18 |
| Augurin                                               | Q9H1Z8    | 0.62 |      |       | 0.29 |      | 0.45    | 0.23 |      |       | 0.00 |       | 0.12    | 1.59  | 3.09  | 2.29  | 0.31  | 0.44  | 1.40  | 1.52   | 0.73  | 0.34  | 0.50  | 0.49  | 0.25  | 0.12  |        | 0.41 |
| Bardet-Biedl syndrome 12 protein                      | Q6ZWE1    |      |      |       |      |      | ND      |      |      |       |      |       | ND      |       |       |       |       |       |       | ND     |       |       |       |       |       |       |        | ND   |
| Basement membrane-specific heparan sulfatase          | P98160    | 1.19 | 1.23 |       | 0.78 |      | 1.07    | 0.31 | 0.72 |       | 0.29 |       | 0.44    | 1.84  | 1.58  | 1.99  | 1.26  | 0.85  | 0.86  | 1.39   | 2.31  | 2.72  | 2.40  | 1.38  | 1.02  | 1.84  |        | 1.94 |
| Beta-2-glycoprotein 1                                 | P02749    |      |      |       |      |      | ND      |      |      |       |      |       | ND      |       |       |       |       |       |       | ND     |       |       |       |       |       |       |        | ND   |
| Beta-enolase                                          | P13929    |      |      |       |      |      | ND      |      |      |       |      |       | ND      |       |       |       |       |       |       | ND     |       |       |       |       |       |       |        | ND   |
| Biglycan                                              | P21810    | 0.59 | 0.46 | 0.623 | 0.38 | 0.52 | 0.52    | 0.26 | 0.34 | 0.430 | 0.15 | 0.44  | 0.33    | 1.84  | 1.56  | 2.16  | 1.23  | 0.67  | 1.22  | 1.44   | 1.83  | 1.54  | 1.63  | 1.24  | 0.40  | 1.12  |        | 1.29 |
| Bone morphogenetic protein 3b                         | P55107    |      |      |       |      |      | ND      |      |      |       |      |       | ND      |       |       |       |       |       |       | ND     |       |       |       |       |       |       |        | ND   |
| Calmodulin                                            | P62158    |      |      |       | 0.92 |      | 0.92    |      |      |       | 0.84 |       | 0.84    |       |       |       |       | 1.47  | 1.55  | 1.51   |       |       | 5.06  |       |       |       |        | 5.06 |
| Carbohydrate sulfotransferase 3                       | Q7LGC8    |      |      |       |      |      | ND      |      |      |       |      |       | ND      |       | 2.41  | 2.16  |       |       |       | 2.28   | 0.33  |       |       |       |       |       |        | 0.33 |
| Carbonic anhydrase 1                                  | P00915    | 0.97 | 0.77 | 1.048 | 0.21 | 1.42 | 0.88    | 0.98 | 0.95 | 1.336 | 0.34 | 4.35  | 1.59    | 0.42  | 0.44  | 0.45  | 0.53  | 0.42  | 0.27  | 0.42   | 0.92  | 1.42  | 2.03  | 0.65  | 1.42  | 0.34  |        | 1.13 |
| Carbonic anhydrase 2                                  | P00918    | 1.29 |      |       |      |      | 1.29    | 1.03 |      |       |      |       | 1.03    |       |       |       |       |       |       | ND     |       |       |       |       |       |       |        | ND   |
| Carbonic anhydrase 3                                  | P07451    | 0.50 |      |       |      |      |         |      |      |       |      |       |         |       |       |       |       |       |       |        |       |       |       |       |       |       |        |      |

|                                                 |                 |            |            |            |            |            |                |            |            |            |            |            |                |              |              |              |              |              |              |               |              |              |              |              |              |              |               |    |
|-------------------------------------------------|-----------------|------------|------------|------------|------------|------------|----------------|------------|------------|------------|------------|------------|----------------|--------------|--------------|--------------|--------------|--------------|--------------|---------------|--------------|--------------|--------------|--------------|--------------|--------------|---------------|----|
| <i>Cartilage intermediate layer protein 1</i>   | O75339          | 0.97       | 1.35       | 1.184      | 1.54       | 0.94       | 1.20           | 0.46       | 0.95       | 1.061      | 0.43       | 0.62       | 0.70           | 1.14         | 0.56         | 0.52         | 0.07         | 0.28         | 0.76         | 0.55          | 0.12         | 0.16         | 0.12         | 0.10         | 0.17         | 0.08         | 0.13          |    |
| <i>Cartilage intermediate layer protein 2</i>   | Q8IUL8          | 1.51       | 1.03       | 1.282      | 1.04       | 1.51       | 1.27           | 0.73       | 0.91       | 1.201      | 0.39       | 2.40       | 1.13           |              | 0.33         | 0.33         | 0.10         | 0.28         | 0.38         | 0.29          | 0.37         |              |              | 0.40         | 0.15         | 0.12         | 0.26          |    |
| <i>Cartilage matrix protein</i>                 | P21941          | 0.16       |            | 0.056      | 0.09       |            | 0.10           | 0.10       |            | 0.043      | 0.06       |            | 0.07           | 4.14         | 3.42         | 6.31         | 3.23         | 1.03         | 7.60         | 4.29          | 7.11         | 3.68         | 8.50         | 4.96         | 1.36         | 7.30         | 5.48          |    |
| <i>Cartilage oligomeric matrix protein</i>      | P49747          | 1.82       | 1.53       | 1.166      | 1.46       | 1.47       | 1.49           | 1.10       | 1.56       | 1.187      | 0.54       | 1.79       | 1.23           | 0.31         | 0.28         | 0.38         | 0.07         | 0.25         | 0.29         | 0.26          | 0.09         | 0.08         | 0.08         | 0.07         | 0.07         | 0.07         | 0.08          |    |
| <i>Cathepsin D</i>                              | P07339          |            |            |            | 0.64       |            | 0.64           |            |            |            | 0.46       |            | 0.46           |              |              |              |              |              |              |               | ND           |              |              |              |              |              | ND            |    |
| <i>Cathepsin G</i>                              | P08311          |            |            |            | 1.62       |            | 1.62           |            |            |            | 2.89       |            | 2.89           |              |              |              |              |              |              |               | ND           |              |              |              |              |              | ND            |    |
| <i>C-C motif chemokine 21</i>                   | O00585          |            |            |            |            |            | ND             |            |            |            |            |            | ND             | 4.51         | 2.96         | 2.60         | 3.56         | 0.97         | 2.40         | 2.83          | 4.75         | 2.89         | 1.86         | 2.15         | 1.28         | 0.80         | 2.29          |    |
| <i>CD44 antigen</i>                             | P16070          | 1.19       |            |            |            |            | 1.19           | 0.00       |            |            |            |            | 0.00           |              |              |              |              |              |              | ND            | ND           |              |              |              |              |              | ND            |    |
| <i>CD9 antigen</i>                              | P21926          |            |            |            |            |            | ND             |            |            |            |            |            | ND             |              |              |              | 2.41         |              |              | 2.41          |              |              |              | 0.51         | 0.58         | 0.55         | ND            |    |
| <i>Ceruloplasmin</i>                            | P00450          |            | 1.25       |            |            | 1.32       | 1.28           |            | 3.45       |            |            | 6.53       | 4.99           |              |              |              |              |              |              | ND            | ND           |              |              |              |              |              | ND            |    |
| <i>Chondroaderin</i>                            | O15335          | 1.46       | 0.86       | 1.215      | 1.06       | 1.11       | 1.14           | 1.02       | 1.35       | 1.091      | 1.20       | 1.88       | 1.31           | 1.65         | 2.30         | 2.39         | 1.67         | 1.78         | 1.92         | 1.95          | 1.77         | 2.83         | 1.73         | 1.88         | 0.93         | 1.94         | 1.85          |    |
| <i>Chondroitin sulfate proteoglycan 4</i>       | Q6UVK1          |            |            |            |            |            | ND             |            |            |            |            |            | ND             |              | 2.35         | 1.73         |              | 1.73         | 0.96         | 1.69          | 1.90         |              | 1.40         |              |              | 1.65         | 1.65          |    |
| <i>Chondromodulin-1</i>                         | O75889          |            |            |            |            |            | ND             |            |            |            |            |            | ND             | 2.04         | 3.58         | 4.26         | 1.73         | 1.68         | 1.53         | 2.47          | 3.51         | 3.16         | 4.27         | 2.51         | 0.97         | 2.50         | 2.82          |    |
| <i>Chordin-like protein 2</i>                   | Q6WN34          |            |            | 2.145      |            |            | 2.15           |            | 1.444      |            |            |            | 1.44           |              |              |              |              |              |              | ND            | ND           |              |              |              |              |              | ND            |    |
| <i>Clusterin</i>                                | P10909          | 2.82       | 1.54       | 0.917      | 1.71       | 1.35       | 1.67           | 2.15       | 1.86       | 1.283      | 0.85       | 3.14       | 1.85           | 0.67         | 0.75         | 0.89         | 0.24         | 0.47         | 0.76         | 0.63          | 0.32         | 0.37         | 0.48         | 0.33         | 0.55         | 0.87         | 0.49          |    |
| <i>Coagulation factor XIII A chain</i>          | P00488          |            | 0.91       |            |            | 1.22       | 1.06           |            | 1.19       |            |            | 2.46       | 1.83           | 1.20         | 1.36         | 1.58         | 2.98         | 0.62         | 0.92         | 1.44          | 2.11         | 3.08         | 1.96         | 2.74         | 1.43         | 3.67         | 2.50          |    |
| <i>Cofilin-1</i>                                | P23528          |            |            |            |            |            | ND             |            |            |            |            |            | ND             |              |              |              |              |              |              | ND            | ND           |              |              |              |              |              | ND            |    |
| <i>Coiled-coil domain-containing protein 80</i> | Q76M96          | 1.56       | 2.01       |            | 0.72       | 1.68       | 1.49           | 1.19       | 3.01       |            | 0.57       | 2.35       | 1.78           | 1.55         | 2.77         | 2.95         |              | 0.65         | 1.08         | 1.80          | 0.92         | 0.80         | 0.66         | 0.67         |              |              | 0.76          |    |
| <i>Collagen alpha-1(I) chain</i>                | P02452          | 0.84       | 1.10       | 1.843      | 1.25       | 0.67       | 1.14           | 0.38       | 0.52       | 1.181      | 0.29       | 0.96       | 0.67           | 1.03         | 1.14         | 2.25         | 0.79         | 0.68         | 0.71         | 1.10          | 1.48         | 1.36         | 1.50         | 0.78         | 0.66         | 0.57         | 1.06          |    |
| <i>Collagen alpha-1(II) chain</i>               | P02458          | 0.75       | 0.92       | 1.895      | 0.89       | 0.61       | 1.01           | 0.42       | 0.66       | 1.299      | 0.55       | 1.17       | 0.82           | 1.50         | 1.77         | 3.35         | 1.02         | 0.84         | 0.93         | 1.57          | 2.19         | 2.12         | 2.22         | 1.14         | 0.30         | 0.78         | 1.46          |    |
| <i>Collagen alpha-1(III) chain</i>              | P02461          | 0.57       | 0.66       | 1.587      | 0.64       | 0.64       | 0.82           | 0.26       | 0.38       | 0.897      | 0.18       | 2.54       | 0.85           | 0.37         | 0.27         | 0.39         | 0.26         | 0.36         | 0.24         | 0.31          | 0.44         | 0.28         | 0.42         | 0.31         | 0.32         | 0.18         | 0.32          |    |
| <i>Collagen alpha-1(IX) chain</i>               | P20849          |            |            |            |            |            | ND             |            |            |            |            |            | ND             | 2.27         | 2.92         | 4.68         |              | 2.87         | 6.57         | 3.86          | 2.66         | 2.94         | 2.96         | 3.91         |              |              | 3.12          |    |
| <i>Collagen alpha-1(V) chain</i>                | P20908          | 1.72       | 1.66       |            | 2.47       | 0.89       | 1.69           | 0.00       | 0.66       |            | 0.31       | 0.49       | 0.37           | 0.67         | 0.34         | 0.49         | 0.85         | 0.35         | 0.27         | 0.49          | 1.78         | 0.87         | 1.12         | 0.85         | 0.45         | 0.55         | 0.94          |    |
| <i>Collagen alpha-1(VI) chain</i>               | P12109          | 0.63       | 0.54       | 0.713      | 0.45       | 0.77       | 0.62           | 0.20       | 0.29       | 0.445      | 0.18       | 1.35       | 0.49           | 4.91         | 6.90         | 2.54         | 0.75         |              |              | 3.78          | 1.32         | 1.41         | 1.61         |              | 0.95         | 0.65         | 1.19          |    |
| <i>Collagen alpha-1(X) chain</i>                | Q03692          | 0.16       | 0.33       | 0.23       |            |            | 0.24           | 0.09       | 0.15       |            | 0.08       |            | 1.03           | 1.22         | 1.03         | 1.52         | 0.77         |              |              | 1.14          | 2.01         | 1.54         | 2.15         |              | 1.30         | 0.34         | 1.47          |    |
| <i>Collagen alpha-1(XI) chain</i>               | P12107          | 0.91       | 1.64       | 2.173      |            |            | 1.58           | 0.32       | 0.68       | 2.085      |            |            | ND             |              |              |              |              |              |              | ND            | ND           |              |              |              |              |              | ND            |    |
| <i>Collagen alpha-1(XII) chain</i>              | Q99715          |            |            |            |            |            | ND             |            |            |            |            |            | ND             |              |              |              |              | 0.47         | 0.00         | 0.24          |              |              | 0.51         |              |              |              | 0.51          |    |
| <i>Collagen alpha-1(XXI) chain</i>              | Q96P44          |            |            |            |            |            | ND             |            |            |            |            |            | 1.71           |              |              |              |              |              |              | ND            |              |              |              |              |              |              | ND            |    |
| <i>Collagen alpha-1(XXIII) chain</i>            | Q86Y22          |            | 1.71       |            |            |            | 1.71           |            | 1.48       |            |            |            | 1.48           |              |              |              |              |              |              | ND            |              |              |              |              |              |              | ND            |    |
| <i>Collagen alpha-2(I) chain</i>                | P08123          | 1.17       | 1.27       | 1.548      | 1.75       | 0.87       | 1.32           | 0.72       | 0.55       | 0.700      | 0.19       | 0.59       | 0.55           | 0.39         | 0.38         | 0.43         | 0.50         | 0.42         | 0.29         | 0.40          | 0.72         | 0.59         | 0.63         | 0.37         | 1.23         | 0.59         | 0.69          |    |
| <i>Collagen alpha-2(IX) chain</i>               | Q14055          |            |            |            | 0.41       |            | 0.41           |            |            |            | 0.58       |            | 0.58           | 1.43         | 2.40         | 3.88         |              |              |              | 2.57          | 4.54         | 2.87         | 3.39         |              |              |              | 3.60          |    |
| <i>Collagen alpha-2(V) chain</i>                | P05997          | 0.61       | 0.96       |            | 0.78       | 0.52       | 0.72           | 0.26       | 0.67       |            | 0.52       | 0.94       | 0.60           |              | 1.60         | 3.22         | 0.97         |              |              | 1.93          | 2.29         |              |              | 0.28         | 0.84         | 1.13         |               |    |
| <i>Collagen alpha-2(VI) chain</i>               | P12110          | 0.80       | 0.59       | 0.840      | 0.61       | 0.76       | 0.72           | 0.40       | 0.39       | 0.611      | 0.17       | 1.20       | 0.55           | 0.76         | 0.57         | 0.77         | 0.80         | 0.40         | 0.30         | 0.60          | 1.73         | 1.38         | 1.45         | 0.88         | 0.47         | 0.71         | 1.10          |    |
| <i>Collagen alpha-2(XI) chain</i>               | P13942          |            | 1.63       | 5.358      | 1.29       | 0.88       | 2.29           |            | 0.69       | 2.899      | 0.37       | 0.51       | 1.12           | 1.28         | 1.19         | 1.82         | 0.95         | 0.75         | 1.06         | 1.18          | 2.37         | 2.51         | 2.81         | 0.94         | 0.90         | 0.98         | 1.75          |    |
| <i>Collagen alpha-3(IX) chain</i>               | Q14050          |            |            |            |            |            | ND             |            |            |            |            |            | ND             |              | 1.44         | 1.72         |              |              |              | 1.58          | 1.36         |              |              |              |              |              | 1.36          |    |
| <i>Collagen alpha-3(VI) chain</i>               | P12111          | 0.81       | 0.61       | 0.861      | 0.41       | 0.68       | 0.67           | 0.37       | 0.38       | 0.591      | 0.17       | 1.05       | 0.51           | 0.61         | 0.53         | 0.57         | 0.79         | 0.46         | 0.35         | 0.55          | 1.75         | 1.24         | 1.24         | 0.77         | 0.49         | 0.87         | 1.06          |    |
| <i>Complement C1q subcomponent subunit A</i>    | P02745          |            |            |            |            |            | ND             |            |            |            |            |            | ND             |              |              |              |              |              |              | ND            |              |              |              |              |              |              |               | ND |
| <i>Complement C1s subcomponent</i>              | P09871          | 3.06       | 2.13       |            | 1.74       |            | 2.31           | 3.45       | 3.69       |            |            | 5.36       | 4.17           |              |              |              |              |              |              | ND            |              |              |              |              |              |              |               | ND |
| <i>Complement C3</i>                            | P01024          | 1.39       |            |            | 2.00       |            | 1.70           | 0.82       |            |            |            | 20.40      | 10.61          | 0.62         | 0.00         | 0.44         |              |              |              | 0.35          | 2.36         | 1.54         | 3.09         |              |              |              | 2.33          |    |
| <i>Complement C4-A</i>                          | P0C0L4          |            | 1.29       |            |            |            | 1.29           |            | 1.29       |            |            |            | 1.29           | 0.87         |              |              |              |              |              | 0.87          | 0.87         |              | 3.60         | 4.85         |              |              | 4.22          |    |
| <i>Complement factor B</i>                      | P00751          |            |            |            | 0.65       |            | 0.65           |            |            |            | 0.49       |            | 0.49           | 0.68         |              |              |              |              |              | 0.68          | 0.68         |              | 3.34         | 5.49         |              |              | 4.41          |    |
| <i>Complement factor D</i>                      | P00746          |            | 1.39       | 1.148      |            |            | 1.27           |            | 1.98       | 1.675      |            |            | 1.83           | 0.65         |              |              | 1.47         |              |              | 1.06          |              | 2.23         | 2.17         |              | 1.52         | 1.69         | 1.91          |    |
| <i>Complement factor H</i>                      | P08603          |            |            |            |            | 1.15       | 1.15           |            |            |            |            | 7.94       | 7.94           |              |              |              |              |              |              | ND            |              |              |              |              |              |              | ND            |    |
| <i>Complement factor H-related protein 1</i>    | Q03591          |            |            |            |            | 1.15       | 1.15           |            |            |            |            | 7.94       | 7.94           |              |              |              |              |              |              | ND            |              |              |              |              |              |              | ND            |    |
| <i>Creatine kinase M-type</i>                   | P06732          | 0.82       | 0.57       | 0.09       |            |            | 0.49           | 0.40       | 0.68       |            | 0.24       |            | 0.44           | 4.08         | 2.28         | 2.44         | 0.46         | 3.27         | 0.61         | 2.19          | 2.72         | 1.73         | 4.14         | 1.10         | 3.80         | 0.58         | 2.35          |    |
| <i>C-type lectin domain family 11 member A</i>  | Q9Y240          |            | 0.86       | 0.674      | 0.59       |            | 0.71           |            | 0.78       | 0.000      | 0.63       |            | 0.47           | 0.72         | 0.93         | 1.21         | 0.45         | 0.83         | 0.49         | 0.77          | 0.92         | 1.43         | 0.98         | 0.62         | 0.75         | 0.28         | 0.83          |    |
| <i>C-type lectin domain family 3 member A</i>   | O75596          | 0.91       | 0.73       | 0.749      | 0.72       | 0.74       | 0.77           | 0.50       | 0.52       | 0.800      | 0.44       | 0.52       | 0.56           | 1.86         | 2.34         | 2.60         | 0.78         | 0.72         | 1.45         | 1.62          | 1.53         | 1.80         | 2.36         | 1.02         | 0.62         | 1.56         | 1.48          |    |
| <i>C-X-C motif chemokine 14</i>                 | O95715          |            |            |            |            |            | ND             |            |            |            |            |            | ND             | 1.85         | 1.43         | 3.28         | 2.08         | 0.72         | 2.09         | 1.91          | 2.18         | 1.38         | 1.43         | 3.20         | 0.61         | 2.23         | 1.84          |    |
| <i>Cystatin-B</i>                               | P04080          |            |            | 1.516      |            |            | 1.52           |            |            | 1.690      |            |            | 1.69           | 2.21         |              |              |              |              |              | 2.21          |              |              | 4.25         | 7.12         |              |              | 5.68          |    |
| <i>Cystatin-C</i>                               | P01034          |            |            |            |            |            | ND             |            |            |            |            |            | ND             |              |              |              |              |              |              | ND            |              |              |              |              |              |              | 0.91          |    |
| <i>Cysteine-rich protein 2</i>                  | P52943          | 0.80       |            |            |            |            | 0.80           | 0.43       |            |            |            |            | 0.43           |              |              |              |              | 2.18         |              | 2.18          |              |              |              |              | 0.61         | 3.13         | 1.87          |    |
| <i>Decorin</i>                                  | P07585          | 1.34       | 1.39       | 0.833      | 1.17       | 1.16       | 1.18           | 0.41       | 0.80       | 0.492      | 0.37       | 0.67       | 0.55           | 0.43         | 0.52         | 0.56         | 0.06         | 0.35         | 0.48         | 0.40          | 0.22         | 0.13         | 0.14         | 0.14         | 0.15         | 0.13         | 0.15          |    |
| <i>Dermatopontin</i>                            | Q07507          | 1.29       | 1.07       | 0.51       | 1.16       |            | 1.00           | 1.08       | 1.85       |            | 0.82       | 2.31       | 1.51           |              |              |              |              |              |              | ND            |              |              |              |              |              |              | ND            |    |
| <i>Dextrin</i>                                  | P60981          |            |            |            |            |            | ND             |            |            |            |            |            | ND             | 1.55         |              |              |              |              |              | 1.55          |              |              | 4.06         | 4.54         |              |              | 4.30          |    |
| <i>Dihydropyrimidinase-related protein 2</i>    | Q16555          | 0.82       |            |            |            |            | 0.82           | 0.60       |            |            |            |            | 0.60           |              |              |              |              |              |              | ND            |              |              |              |              |              |              | ND            |    |
| <i>Dihydropyrimidinase-related protein 3</i>    | Q14195          |            | 0.75       |            |            |            | 0.75           |            | 0.95       |            |            |            | 0.95           |              |              |              |              |              |              | ND            |              |              |              |              |              |              | ND            |    |
| <b>Protein name</b>                             | <b>Accesion</b> | <b>AF7</b> | <b>AF6</b> | <b>AF3</b> | <b>AF9</b> | <b>AF2</b> | <b>AF-mean</b> | <b>NP7</b> | <b>NP6</b> | <b>NP3</b> | <b>NP9</b> | <b>NP2</b> | <b>NP-mean</b> | <b>R (A)</b> | <b>R (B)</b> | <b>R (C)</b> | <b>R (D)</b> | <b>R (E)</b> | <b>R (F)</b> | <b>R-mean</b> | <b>T (A)</b> | <b>T (B)</b> | <b>T (C)</b> | <b>T (D)</b> | <b>T (E)</b> | <b>T (F)</b> | <b>T-mean</b> |    |



|                                              |          |      |      |       |      |      |         |      |       |       |      |       |         |       |       |       |       |       |       |        |       |       |       |       |       |       |        |       |
|----------------------------------------------|----------|------|------|-------|------|------|---------|------|-------|-------|------|-------|---------|-------|-------|-------|-------|-------|-------|--------|-------|-------|-------|-------|-------|-------|--------|-------|
| Histone H2A type 1                           | P0C0S8   | 1.15 | 0.44 | 0.000 | 0.64 | 0.86 | 0.62    | 1.16 | 0.56  | 1.082 | 0.71 | 1.13  | 0.93    | 1.15  | 0.74  | 0.96  | 1.70  | 1.10  | 0.96  | 1.10   | 3.39  | 2.81  | 2.49  | 2.14  | 1.28  | 2.73  | 2.47   |       |
| Histone H2B type 1-B                         | P33778   | 1.12 |      |       | 0.45 | 0.84 | 0.80    | 1.19 |       |       | 0.37 | 0.60  | 0.72    |       |       |       | 1.30  |       |       |        | 1.30  |       |       |       | 1.40  | 1.63  | 1.51   |       |
| Histone H2B type 1-D                         | P58876   | 1.12 |      |       | 0.45 |      | 0.78    | 1.19 |       |       | 0.37 |       | 0.78    |       | 0.67  | 0.93  | 1.27  | 0.78  | 0.67  |        | 0.86  | 2.86  |       | 1.43  | 1.39  | 1.60  | 1.82   |       |
| Histone H2B type 1-K                         | O60814   |      |      | 0.983 |      |      | 0.98    |      | 1.278 |       |      |       | 1.28    |       |       |       |       | 0.77  | 0.66  |        |       |       |       | 1.42  |       |       | 1.42   |       |
| Histone H2B type 2-E                         | Q16778   |      |      |       |      |      | ND      |      |       |       |      |       | ND      | 0.86  |       |       | 1.30  |       |       |        |       | 1.90  | 2.08  |       | 1.40  | 1.63  | 1.75   |       |
| Histone H3.2                                 | Q71D13   |      |      |       |      |      | ND      |      |       |       |      |       | ND      |       |       |       | 1.56  | 1.12  | 0.87  |        |       |       |       | 2.75  | 1.78  | 2.13  | 2.22   |       |
| Histone H3.3                                 | P84243   |      |      |       |      |      | ND      |      |       |       |      |       | ND      | 1.18  | 1.26  | 1.76  |       |       |       |        | 1.40  | 2.57  | 2.36  | 2.43  |       |       | 2.46   |       |
| Histone H3-like                              | Q6NXT2   | 1.36 | 0.96 | 1.289 | 0.65 |      | 1.07    | 1.49 | 1.28  | 1.612 | 0.44 |       | 1.20    |       |       |       |       |       |       |        | ND    |       |       |       |       |       | ND     |       |
| Histone H4                                   | P62805   |      |      |       | 0.44 |      | 0.44    |      |       |       | 1.27 |       | 1.27    | 1.19  | 1.19  | 1.44  | 2.14  | 0.60  | 0.81  |        | 1.23  | 4.07  | 3.61  | 2.57  | 3.36  | 0.86  | 1.60   | 2.68  |
| Histone-lysine N-methyltransferase MLL3      | Q8NEZ4   |      | 1.10 |       | 0.99 |      | 1.05    |      | 1.10  |       | 0.49 |       | 0.80    |       |       |       |       |       |       |        | ND    |       |       |       |       |       | ND     |       |
| Homeobox protein Hox-D13                     | P35453   |      |      |       |      |      | ND      |      |       |       |      |       | ND      |       |       |       |       |       |       |        | ND    |       |       |       |       |       | ND     |       |
| Homeobox-containing protein 1                | Q6NT76   |      |      |       |      |      | ND      |      |       |       |      |       | ND      |       |       |       |       |       |       |        | ND    |       |       |       |       |       | ND     |       |
| Hyaluronan and proteoglycan link protein 1   | P10915   | 0.55 | 0.93 | 0.403 | 0.46 | 0.33 | 0.53    | 0.23 | 0.41  | 0.276 | 0.33 | 0.39  | 0.33    | 1.36  | 2.16  | 2.37  | 1.86  | 1.14  | 1.41  |        | 1.72  | 1.71  | 1.47  | 1.82  | 1.90  | 0.93  | 0.89   | 1.45  |
| Hyaluronan and proteoglycan link protein 4   | Q86UW8   |      |      | 0.323 |      |      | 0.32    |      |       | 0.172 |      |       | 0.17    |       |       |       |       |       |       |        | ND    |       |       |       |       |       |        | ND    |
| Ig alpha-1 chain C region                    | P01876   |      |      |       | 0.53 | 1.50 | 1.01    |      |       |       | 0.21 | 19.93 | 10.07   | 0.89  |       |       | 2.31  |       |       |        | 1.60  |       | 4.51  | 3.91  |       | 2.68  | 3.37   | 3.62  |
| Ig gamma-1 chain C region                    | P01857   | 0.32 | 0.30 | 1.831 | 0.34 | 1.38 | 0.83    | 0.18 | 0.23  | 0.480 | 0.12 | 18.62 | 3.93    | 0.53  | 0.51  | 0.37  | 1.01  | 0.38  | 0.30  |        | 0.52  | 3.13  | 1.05  | 3.38  | 0.99  | 0.83  | 0.95   | 1.72  |
| Ig gamma-2 chain C region                    | P01859   | 0.65 | 0.48 |       | 0.19 | 1.63 | 0.74    | 0.27 | 0.36  |       | 0.08 | 18.69 | 4.85    |       | 0.46  | 0.33  | 0.43  |       |       |        | 0.41  | 1.89  |       |       | 0.63  | 0.98  | 1.16   |       |
| Ig gamma-3 chain C region                    | P01860   |      | 0.31 | 5.831 | 0.32 | 1.51 | 1.99    |      | 0.23  | 1.196 | 0.11 | 22.31 | 5.96    | 0.54  | 0.48  | 0.37  | 1.02  | 0.38  | 0.32  |        | 0.52  | 3.32  | 1.10  | 3.44  | 0.99  | 0.87  | 1.05   | 1.79  |
| Ig gamma-4 chain C region                    | P01861   |      |      |       |      | 1.75 | 1.75    |      |       |       |      | 21.77 | 21.77   | 0.85  |       |       |       |       |       |        | 0.85  |       | 0.68  | 2.44  |       |       | 1.56   |       |
| Ig heavy chain V-I region EU                 | P01742   |      |      |       | 0.23 |      | 0.23    |      |       | 0.00  |      |       | 0.00    |       |       |       |       |       |       |        | ND    |       |       |       |       |       | ND     |       |
| Ig heavy chain V-III region WEA              | P01763   |      |      |       |      |      | ND      |      |       |       |      |       | ND      |       |       |       | 0.89  |       |       |        | 0.89  |       |       |       | 0.71  | 0.00  | 0.36   |       |
| Ig kappa chain C region                      | P01834   | 0.54 | 0.45 | 1.294 | 0.43 | 1.35 | 0.81    | 0.36 | 0.40  | 0.815 | 0.62 | 12.14 | 2.87    | 0.53  | 0.71  | 0.70  | 1.03  | 0.63  | 0.61  |        | 0.70  | 3.24  | 1.47  | 2.95  | 1.12  | 0.89  | 1.28   | 1.83  |
| Ig kappa chain V-III region SIE              | P01620   |      |      |       |      |      | ND      |      |       |       |      |       | ND      |       |       |       |       |       |       |        | ND    |       |       |       |       |       |        | ND    |
| Ig lambda chain C regions                    | P01842   |      | 0.73 | 2.030 | 0.39 | 1.28 | 1.11    |      | 0.65  | 1.167 | 0.22 | 15.42 | 4.36    | 0.70  | 0.79  | 0.72  | 1.45  | 0.41  | 0.54  |        | 0.77  | 3.96  | 1.47  | 3.31  | 0.73  | 1.48  | 2.00   | 2.16  |
| Immunoglobulin superfamily containing leuc   | O14498   |      |      |       |      |      | ND      |      |       |       |      |       | ND      | 0.99  | 1.70  | 2.25  | 0.80  | 0.55  | 0.97  |        | 1.21  | 1.80  | 1.36  | 1.25  | 1.03  | 0.44  | 1.02   | 1.15  |
| Inhibin beta A chain                         | P08476   |      | 4.23 |       | 1.26 |      | 2.74    |      | 9.21  |       | 2.69 |       | 5.95    |       |       |       |       |       |       |        | ND    |       |       |       |       |       |        | ND    |
| Insulin-like growth factor-binding protein 7 | Q16270   |      |      |       |      | 0.66 | 0.66    |      |       |       |      | 2.06  | 2.06    |       |       |       |       |       |       |        | ND    |       |       |       |       |       |        | ND    |
| Inter-alpha-trypsin inhibitor heavy chain H1 | P19827   |      |      | 1.133 |      |      | 1.13    |      |       | 0.000 |      |       | 0.00    |       |       |       |       |       |       |        | ND    |       |       |       |       |       |        | ND    |
| Inter-alpha-trypsin inhibitor heavy chain H5 | Q6UXX5   |      |      |       |      |      | ND      |      |       |       |      |       | ND      | 2.32  | 1.45  | 2.15  |       | 0.92  | 0.76  |        | 1.52  | 4.04  | 6.27  | 10.55 | 1.95  |       |        | 5.70  |
| Isocitrate dehydrogenase [NADP] cytoplasmic  | O75874   |      |      |       |      |      | ND      |      |       |       |      |       | ND      | 2.92  | 1.36  | 2.04  | 4.08  | 1.09  | 1.53  |        | 2.17  | 5.21  | 5.50  | 4.80  | 6.23  | 1.19  | 4.06   | 4.50  |
| Keratin, type II cytoskeletal 1              | P04264   |      |      |       |      |      | ND      |      |       |       |      |       | ND      |       |       |       |       |       |       |        | ND    |       |       |       |       |       |        | ND    |
| Kinesin heavy chain isoform 5A               | Q12840   |      |      |       |      |      | ND      |      |       |       |      |       | ND      |       |       |       |       |       |       |        | ND    |       |       |       |       |       |        | ND    |
| Lactadherin                                  | Q08431   | 1.14 | 0.96 | 0.397 | 0.91 | 0.41 | 0.76    | 0.47 | 0.46  | 0.360 | 0.19 | 0.39  | 0.37    | 2.01  | 2.51  | 3.18  | 2.26  | 1.31  | 2.26  |        | 2.25  | 1.58  | 2.90  | 1.91  | 2.58  | 0.73  | 1.25   | 1.82  |
| Lactotransferrin                             | P02788   |      |      |       | 1.65 |      | 1.65    |      |       |       | 3.78 |       | 3.78    |       | 1.53  | 0.00  |       |       |       |        | 0.76  | 36.65 |       |       |       |       |        | 36.65 |
| Lambda-crystallin homolog                    | Q9Y2S2   |      |      |       |      |      | ND      |      |       |       |      |       | ND      |       |       |       | 5.00  |       |       |        | 5.00  |       |       |       |       | 0.73  | 2.63   | 1.68  |
| Lamin-A/C                                    | P02545   | 0.54 | 0.65 | 0.295 | 0.32 |      | 0.45    | 0.31 | 0.60  | 0.276 | 3.88 |       | 1.27    | 0.61  | 0.69  | 0.92  | 1.11  | 0.68  | 0.33  |        | 0.72  | 2.93  | 1.49  | 1.77  | 1.06  | 1.64  | 1.10   | 1.66  |
| Leucine-rich alpha-2-glycoprotein            | P02750   |      |      |       | 1.78 |      | 1.78    |      |       | 0.00  |      |       | 0.00    |       |       |       |       |       |       |        | ND    |       |       |       |       |       |        | ND    |
| Leukocyte cell-derived chemotaxin-2          | O14960   | 2.29 |      |       | 0.91 |      | 1.60    | 1.87 |       |       | 1.00 |       | 1.43    | 1.06  | 1.74  | 1.54  | 2.25  | 0.78  | 1.20  |        | 1.43  | 2.85  | 5.68  | 3.05  | 2.71  | 1.03  | 3.15   | 3.08  |
| Leukocyte elastase                           | P08246   | 2.31 |      |       |      | 1.56 | 1.94    | 4.27 |       |       |      | 2.15  | 3.21    |       |       |       |       |       |       |        | ND    |       |       |       |       |       |        | ND    |
| L-lactate dehydrogenase A chain              | P00338   | 1.05 | 0.78 |       | 0.44 |      | 0.76    | 0.57 | 1.26  |       | 0.34 |       | 0.72    | 1.60  | 1.08  | 1.24  | 1.96  |       |       |        | 1.47  | 1.97  | 1.53  | 1.26  |       | 0.97  | 1.23   | 1.39  |
| L-lactate dehydrogenase B chain              | P07195   |      |      |       |      |      | ND      |      |       |       |      |       | ND      | 0.79  | 0.46  | 1.22  | 4.22  |       |       |        | 1.67  | 9.36  | 3.65  | 7.44  |       | 1.07  | 2.10   | 4.72  |
| Lubricin (proteoglycan 4)                    | Q92954   | 2.19 | 4.18 | 0.839 | 0.82 | 1.43 | 1.89    | 5.21 | 8.54  | 4.269 | 3.54 | 1.40  | 4.59    | 0.06  | 0.04  | 0.05  | 0.06  | 0.16  | 0.12  |        | 0.08  | 0.05  | 0.09  | 0.09  | 0.17  | 0.09  | 0.07   | 0.09  |
| Lumican                                      | P51884   | 1.65 | 2.32 | 1.252 | 1.55 | 1.28 | 1.61    | 0.71 | 2.03  | 1.284 | 0.93 | 1.57  | 1.30    | 0.12  | 0.13  | 0.22  | 0.07  | 0.22  | 0.33  |        | 0.18  | 0.16  | 0.10  | 0.13  | 0.08  | 0.14  | 0.12   | 0.12  |
| Lysozyme C                                   | P61626   | 2.00 | 0.95 | 1.416 | 0.99 | 0.66 | 1.20    | 1.88 | 1.48  | 1.472 | 1.30 | 0.72  | 1.37    | 1.41  | 2.39  | 1.86  | 11.57 | 3.16  | 1.44  |        | 3.64  | 17.48 | 10.83 | 8.60  | 13.70 | 8.09  | 6.75   | 10.91 |
| Malate dehydrogenase, cytoplasmic            | P40925   |      |      |       |      |      | ND      |      |       |       |      |       | ND      |       | 1.01  | 1.35  | 2.59  | 0.62  | 0.84  |        | 1.28  | 4.29  |       |       | 2.92  | 0.94  | 2.84   | 2.75  |
| Malate dehydrogenase, mitochondrial          | P40926   |      |      |       | 0.46 |      | 0.46    |      |       |       | 0.37 |       | 0.37    | 1.30  |       |       | 1.49  |       |       |        | 1.40  |       | 5.23  | 5.26  |       | 1.58  | 2.02   | 3.52  |
| Matrilin-3                                   | O15232   |      |      | 0.106 | 0.07 |      | 0.09    |      |       | 0.085 | 0.04 |       | 0.06    | 2.74  | 2.28  | 2.64  | 0.58  | 0.74  | 2.34  |        | 1.89  | 1.26  | 1.57  | 1.36  | 1.04  | 0.37  | 1.93   | 1.25  |
| Matrix Gla protein                           | P08493   |      |      |       |      |      | ND      |      |       |       |      |       | ND      | 0.67  |       |       | 1.37  | 2.03  | 0.82  |        | 1.22  |       | 3.06  | 2.63  | 1.11  | 2.20  | 2.26   | 2.25  |
| Melanoma-derived growth regulatory protei    | Q16674   |      |      |       |      |      | ND      |      |       |       |      |       | ND      | 1.36  |       |       |       |       |       |        | 1.36  |       | 1.54  | 2.02  |       |       |        | 1.78  |
| Melanotransferrin                            | P08582   |      | 1.62 |       |      |      | 1.62    |      | 2.66  |       |      |       | 2.66    |       |       |       | 2.20  |       |       |        | 2.20  |       |       |       |       | 1.44  | 2.14   | 1.79  |
| Microfibril-associated glycoprotein 4        | P55083   | 2.17 |      |       | 1.50 |      | 1.83    | 1.36 |       |       | 0.66 |       | 1.01    | 1.28  | 0.62  | 0.85  | 1.00  | 0.94  | 0.99  |        | 0.95  | 2.09  | 1.86  | 1.61  | 1.50  | 0.79  | 1.47   | 1.55  |
| Mimecan                                      | P20774   | 1.47 | 1.02 | 1.578 | 1.05 | 1.79 | 1.38    | 0.53 | 0.92  | 1.098 | 0.54 | 1.78  | 0.97    | 0.13  | 0.09  | 0.12  | 0.16  | 0.13  | 0.06  |        | 0.12  | 0.35  | 0.18  | 0.29  | 0.19  | 0.13  | 0.12   | 0.21  |
| Mitofusin-1                                  | Q8IWA4   |      | 5.13 |       |      |      | 5.13    |      | 1.54  |       |      |       | 1.54    |       |       |       |       |       |       |        | ND    |       |       |       |       |       |        | ND    |
| Moesin                                       | P26038   |      | 0.75 |       | 0.52 |      | 0.64    |      | 0.73  |       | 0.38 |       | 0.55    | 1.14  | 0.86  | 1.16  | 3.09  | 0.64  | 0.73  |        | 1.27  | 4.16  | 3.79  | 4.48  | 2.98  | 1.00  | 2.61   | 3.17  |
| Myeloblastin                                 | P24158   | 5.40 |      |       |      |      | 5.40    | 8.64 |       |       |      |       | 8.64    |       |       |       |       |       |       |        | ND    |       |       |       |       |       |        | ND    |
| Myocilin                                     | Q99972   | 0.93 |      |       | 0.25 |      | 0.59    | 0.66 |       |       | 0.80 |       | 0.73    |       |       |       |       |       |       |        | ND    |       |       |       |       |       |        | ND    |
| Protein name                                 | Accesion | AF7  | AF6  | AF3   | AF9  | AF2  | AF-mean | NP7  | NP6   | NP3   | NP9  | NP2   | NP-mean | R (A) | R (B) | R (C) | R (D) | R (E) | R (F) | R-mean | T (A) | T (B) | T (C) | T (D) | T (E) | T (F) | T-mean |       |



|                                                    |                 |            |            |            |            |            |                |            |            |            |            |            |                |              |              |              |              |              |              |               |             |             |             |             |             |             |               |      |      |       |      |
|----------------------------------------------------|-----------------|------------|------------|------------|------------|------------|----------------|------------|------------|------------|------------|------------|----------------|--------------|--------------|--------------|--------------|--------------|--------------|---------------|-------------|-------------|-------------|-------------|-------------|-------------|---------------|------|------|-------|------|
| <i>Rab GDP dissociation inhibitor beta</i>         | P50395          |            | 0.34       |            |            |            | 0.34           |            | 0.11       |            |            |            | 0.11           | 1.13         | 1.85         | 3.02         |              |              |              |               |             |             | 2.00        | 6.00        | 3.68        | 3.75        |               |      |      |       | 4.48 |
| <i>Ras GTPase-activating-like protein IQGAP1</i>   | P46940          |            |            |            |            |            | ND             |            |            |            |            |            | ND             | 2.11         |              |              |              |              |              |               |             |             | 2.11        | 5.70        | 5.37        |             |               |      |      | 5.53  |      |
| <i>Ras-like protein family member 11A</i>          | Q6T310          |            | 7.04       |            |            |            | 7.04           |            | 8.14       |            |            |            | 8.14           |              |              |              |              |              |              |               |             |             | ND          |             |             |             |               |      |      | ND    |      |
| <i>Reticulocalbin-3</i>                            | Q96D15          | 1.03       |            |            | 0.38       |            | 0.71           |            | 0.25       |            |            |            | 0.23           |              |              |              |              |              |              |               |             | 1.11        | 1.69        |             |             | 0.71        |               |      | 0.71 |       |      |
| <i>Retinoic acid receptor responder protein 2</i>  | Q99969          | 1.70       | 0.64       | 0.967      | 1.10       |            | 1.10           |            | 1.06       | 0.56       | 0.772      | 0.61       | 0.75           |              | 1.68         | 1.53         |              |              |              |               | 1.26        | 1.16        |             | 1.66        |             | 1.96        |               | 1.81 |      |       |      |
| <i>Retinol-binding protein 4</i>                   | P02753          | 1.80       |            |            |            |            | 1.80           |            | 2.06       |            |            |            | 2.06           |              |              |              |              |              |              |               |             | 1.58        | 3.22        |             |             | 0.80        |               |      | 0.80 |       |      |
| <i>Rho GTPase-activating protein 18-like</i>       | Q5TG30          |            |            |            |            |            | ND             |            |            |            |            |            | ND             |              |              |              |              |              |              |               |             | 1.82        |             |             |             | 2.44        | 5.87          |      | 4.16 |       |      |
| <i>Rho GTPase-activating protein 30</i>            | Q72616          |            |            |            |            |            | ND             |            |            |            |            |            | ND             |              | 1.46         | 1.70         |              |              |              |               |             |             |             | 1.57        |             |             |               |      | 1.57 |       |      |
| <i>Ribonuclease 4</i>                              | P34096          | 1.64       | 0.88       | 1.361      | 1.39       |            | 1.32           |            | 1.33       | 1.18       | 1.120      | 1.28       | 1.23           | 1.37         | 2.36         | 1.55         | 1.04         | 1.43         | 0.57         |               |             |             | 1.39        | 1.68        | 1.83        | 1.39        | 0.81          | 1.39 | 1.36 | 1.41  |      |
| <i>Ribosome-binding protein 1</i>                  | Q9P2E9          |            |            |            |            |            | ND             |            |            |            |            |            | ND             |              |              |              |              |              |              |               |             |             |             |             |             |             |               |      | ND   |       |      |
| <i>Secernin-1</i>                                  | Q12765          |            |            |            |            |            | ND             |            |            |            |            |            | ND             |              |              |              |              |              |              |               |             | 4.00        |             |             |             |             |               |      | ND   |       |      |
| <i>Secreted frizzled-related protein 3</i>         | Q92765          |            |            |            | 0.26       |            | 0.26           |            |            |            |            | 0.35       | 0.35           | 1.99         | 2.21         | 2.00         | 1.31         | 1.36         | 2.10         |               |             |             | 4.00        |             |             |             | 0.91          | 7.08 | 3.99 |       |      |
| <i>Selenium-binding protein 1</i>                  | Q13228          |            |            |            |            |            | ND             |            |            |            |            |            | ND             | 0.93         | 1.10         | 1.23         |              |              |              |               |             |             |             | 1.63        | 1.77        | 1.76        | 1.53          | 0.74 | 1.37 | 1.47  |      |
| <i>Semaphorin-4A</i>                               | Q9H3S1          |            | 4.47       |            |            |            | 4.47           |            |            | 4.61       |            |            | 4.61           |              |              |              |              |              |              |               |             |             |             | 1.09        | 6.80        | 6.47        | 9.31          |      |      | 7.52  |      |
| <i>Semaphorin-4C</i>                               | Q9C0C4          |            |            |            |            | 1.79       | 1.79           |            |            |            |            | 3.02       | 3.02           |              |              |              |              |              |              |               |             |             |             |             |             |             |               |      | ND   |       |      |
| <i>Serine protease HTRA1</i>                       | Q92743          | 2.61       | 3.55       | 0.777      | 1.83       | 1.90       | 2.13           |            | 1.89       | 3.01       | 1.618      | 0.85       | 2.26           | 1.92         | 0.08         | 0.17         | 0.22         | 0.22         | 0.25         | 0.24          |             |             | 0.20        | 0.14        | 0.27        | 0.26        | 0.20          | 0.23 | 0.36 | 0.24  |      |
| <i>Serotransferrin</i>                             | P02787          | 0.84       | 0.48       | 1.566      | 0.53       | 1.50       | 0.98           |            | 0.73       | 0.38       | 0.772      | 0.19       | 11.51          | 2.71         | 0.60         | 0.52         | 0.63         | 0.61         |              |               |             |             | 0.59        | 1.90        | 0.90        | 3.17        |               | 1.04 | 0.57 | 1.52  |      |
| <i>Serum albumin</i>                               | P02768          | 0.50       | 0.35       | 0.835      | 0.32       | 2.09       | 0.82           |            | 0.25       | 0.23       | 0.541      | 0.15       | 19.94          | 4.22         | 0.60         | 0.36         | 0.36         | 0.42         | 0.53         | 0.28          |             |             | 0.42        | 1.43        | 0.46        | 0.99        | 0.43          | 0.71 | 0.36 | 0.73  |      |
| <i>Serum amyloid P-component</i>                   | P02743          | 0.73       |            |            |            |            | 0.73           |            | 0.40       |            |            |            | 0.40           |              |              |              |              |              | 1.18         | 0.52          |             |             | 0.85        |             |             | 0.97        |               |      | 0.97 |       |      |
| <i>SPARC</i>                                       | P09486          |            | 0.45       |            | 0.27       |            | 0.36           |            | 0.31       |            |            | 0.07       | 0.19           | 1.93         | 3.63         | 1.75         |              |              | 1.11         | 0.61          |             |             | 1.81        | 0.85        | 0.60        | 0.54        | 0.23          |      | 0.56 |       |      |
| <i>SPARC-related modular calcium-binding pr</i>    | Q9H3U7          |            |            |            |            |            | ND             |            |            |            |            |            | ND             |              |              |              |              |              |              |               |             |             |             |             |             |             |               |      | ND   |       |      |
| <i>Spectrin alpha chain, brain</i>                 | Q13813          |            |            |            |            |            | ND             |            |            |            |            |            | ND             | 0.59         |              |              |              |              |              |               |             |             | 0.59        |             | 1.53        | 3.02        |               |      | 2.27 |       |      |
| <i>Stanniocalcin-2</i>                             | O76061          |            |            |            |            |            | ND             |            |            |            |            |            | ND             | 10.65        | 8.50         |              |              |              |              |               |             |             | 9.57        | 1.85        |             |             |               |      | 1.85 |       |      |
| <i>Stromal cell-derived factor 1</i>               | P48061          | 1.69       |            |            | 0.84       |            | 1.26           |            | 1.18       |            |            | 1.02       | 1.10           |              | 2.03         | 2.42         |              |              |              |               |             |             | 2.22        | 1.48        |             |             |               |      | 1.48 |       |      |
| <i>Stromelysin-1</i>                               | P08254          | 1.63       | 0.62       |            |            |            | 1.13           |            | 2.08       | 1.00       |            |            | 1.54           |              |              |              |              |              |              |               |             |             |             |             |             |             |               |      | ND   |       |      |
| <i>Superoxide dismutase [Cu-Zn]</i>                | P00441          |            |            |            |            |            | ND             |            |            |            |            |            | ND             |              |              |              |              |              |              |               |             |             |             |             |             |             |               |      | ND   |       |      |
| <i>Sushi repeat-containing protein SRPX2</i>       | O60687          | 0.49       | 0.57       | 0.582      | 0.38       | 0.43       | 0.49           |            | 0.25       | 0.46       | 0.582      | 0.13       | 0.70           | 0.42         | 2.13         | 2.04         | 3.89         | 1.57         | 0.78         | 2.18          |             |             | 2.10        | 2.52        | 1.87        | 1.94        | 1.67          | 0.45 | 1.41 | 1.64  |      |
| <i>Target of Nesh-SH3</i>                          | Q7Z7G0          | 2.12       | 2.46       | 2.556      | 1.45       | 1.45       | 2.00           |            | 2.22       | 3.57       | 2.621      | 1.65       | 2.70           | 2.55         |              | 0.06         | 0.06         | 0.06         | 0.10         | 0.04          |             |             | 0.06        | 0.14        |             | 0.10        | 0.06          | 0.08 | 0.10 |       |      |
| <i>Tenascin</i>                                    | P24821          | 0.97       | 4.14       |            | 0.19       |            | 1.77           |            | 0.50       | 2.62       |            | 0.10       | 1.07           |              |              |              |              |              |              |               |             |             |             |             |             |             |               |      | ND   |       |      |
| <i>Tenascin-X</i>                                  | P22105          | 0.58       | 0.56       | 0.362      | 0.20       | 0.57       | 0.45           |            | 0.42       | 0.45       | 0.320      | 0.15       | 0.76           | 0.42         |              |              |              |              |              |               |             |             |             |             |             |             |               |      | ND   |       |      |
| <i>Tetranectin</i>                                 | P05452          | 0.36       |            |            | 0.08       |            | 0.22           |            | 0.18       |            |            | 0.02       | 0.10           | 0.32         | 0.39         | 0.69         | 1.65         |              |              |               |             |             | 0.76        | 3.23        | 2.04        | 3.17        |               | 1.12 | 1.89 | 2.29  |      |
| <i>Thrombospondin type-1 domain-containing</i>     | Q6ZMP0          |            |            |            |            |            | ND             |            |            |            |            |            | ND             | 1.49         |              |              | 25.52        |              |              |               |             |             | 13.50       |             | 15.69       | 67.31       |               | 3.67 | 9.16 | 23.96 |      |
| <i>Thrombospondin-1</i>                            | P07996          | 1.53       | 0.66       | 0.347      | 0.88       | 1.19       | 0.92           |            | 0.30       | 0.25       | 0.209      | 0.09       | 0.87           | 0.34         | 0.98         | 1.04         | 1.66         | 1.12         | 0.47         | 1.43          |             |             | 1.11        | 0.92        | 0.92        | 1.36        | 1.26          | 0.48 | 0.80 | 0.96  |      |
| <i>Thrombospondin-3</i>                            | P49476          | 1.55       |            | 0.991      | 1.06       | 1.12       | 1.18           |            | 0.72       |            | 1.028      | 0.37       | 1.15           | 0.82         | 0.38         | 0.33         | 0.45         |              |              |               |             |             | 0.39        | 0.12        | 0.09        | 0.10        |               |      | 0.10 |       |      |
| <i>Thrombospondin-4</i>                            | P35443          |            |            |            |            |            | ND             |            |            |            |            |            | ND             |              |              |              |              |              |              |               |             |             |             |             |             |             |               |      | ND   |       |      |
| <i>Transaldolase</i>                               | P37837          |            |            |            |            |            | ND             |            |            |            |            |            | ND             |              |              |              |              | 1.28         |              |               |             |             | 1.28        |             |             |             | 0.48          | 1.57 | 1.03 |       |      |
| <i>Transforming growth factor-beta-induced pr</i>  | Q15582          | 2.07       | 1.36       | 1.100      | 0.35       |            | 1.22           |            | 1.42       | 1.53       | 1.599      | 0.24       | 1.20           | 0.93         | 1.13         | 1.42         | 1.05         |              |              |               |             |             | 1.13        | 2.49        | 1.56        | 1.80        |               | 1.04 | 0.00 | 1.38  |      |
| <i>Transgelin</i>                                  | Q01995          |            |            |            |            |            | ND             |            |            |            |            |            | ND             | 1.25         |              |              |              |              |              |               |             |             |             | 1.25        |             | 10.77       | 6.64          |      |      | 8.71  |      |
| <i>Transketolase</i>                               | P29401          |            |            |            |            |            | ND             |            |            |            |            |            | ND             |              |              |              | 2.61         |              |              |               |             |             | 2.61        |             |             |             | 1.52          | 1.75 | 1.64 |       |      |
| <i>Translationally-controlled tumor protein</i>    | P13693          |            |            |            |            |            | ND             |            |            |            |            |            | ND             |              |              |              | 3.31         |              |              |               |             |             | 3.31        |             |             |             | 1.23          | 2.90 | 2.06 |       |      |
| <i>Transmembrane protein 132D</i>                  | Q14C87          | 1.82       |            |            |            |            | 1.82           |            | 1.26       |            |            |            | 1.26           |              |              |              |              |              |              |               |             |             |             |             |             |             |               |      | ND   |       |      |
| <i>Transthyretin</i>                               | P02766          | 0.76       | 0.60       |            | 0.39       | 1.68       | 0.86           |            | 0.45       | 0.44       |            | 0.13       | 7.06           | 2.02         | 0.70         | 0.47         | 0.59         | 0.74         | 0.37         | 0.30          |             |             | 0.53        | 1.83        | 0.87        | 1.40        | 0.47          | 1.08 | 0.80 | 1.07  |      |
| <i>Triosephosphate isomerase</i>                   | P60174          | 1.09       | 1.03       |            | 0.47       | 0.85       | 0.86           |            | 0.72       | 0.83       |            | 0.26       | 0.99           | 0.70         | 1.37         | 0.90         | 1.24         | 1.08         | 0.89         | 0.67          |             |             | 1.03        | 2.19        | 1.69        | 1.44        | 1.15          | 0.74 | 1.43 | 1.44  |      |
| <i>Tropomyosin alpha-4 chain</i>                   | P67936          |            |            |            |            |            | ND             |            |            |            |            |            | ND             |              | 1.87         | 1.53         |              |              | 4.02         | 1.13          |             |             | 2.14        | 3.16        |             | 1.68        |               |      | 2.42 |       |      |
| <i>Tropomyosin beta chain</i>                      | P07951          |            |            |            |            |            | ND             |            |            |            |            |            | ND             |              |              |              |              | 1.79         |              |               |             |             |             |             |             |             | 4.36          | 2.15 | 3.25 |       |      |
| <i>Tryptase beta-1</i>                             | Q15661          |            |            |            |            |            | ND             |            |            |            |            |            | ND             |              | 0.83         | 1.02         |              |              |              |               |             |             | 0.93        | 3.68        |             |             |               |      | 3.68 |       |      |
| <i>Tubulin alpha-1C chain</i>                      | Q9BQE3          |            |            |            |            |            | ND             |            |            |            |            |            | ND             |              |              |              |              | 3.93         |              |               |             |             | 3.93        |             |             |             | 1.59          | 2.79 | 2.19 |       |      |
| <i>Tubulin beta-2B chain</i>                       | Q9BVA1          | 1.35       |            |            | 0.30       |            | 0.82           |            | 0.93       |            |            | 0.41       | 0.67           |              |              |              |              |              | 0.68         | 1.05          |             |             | 0.86        |             |             | 3.75        |               |      | 3.75 |       |      |
| <i>Tumor necrosis factor receptor superfamily</i>  | O00300          | 3.34       | 3.98       | 0.897      | 1.28       |            | 2.38           |            | 1.45       | 3.11       | 1.290      | 1.35       | 1.80           |              |              |              |              |              |              |               |             |             |             |             |             |             |               |      | ND   |       |      |
| <i>Ubiquitin carboxyl-terminal hydrolase 25</i>    | Q9UHP3          |            |            |            | 0.18       |            | 0.18           |            |            |            |            | 0.11       | 0.11           |              |              |              |              |              |              |               |             |             |             |             |             |             |               |      | ND   |       |      |
| <i>Ubiquitin</i>                                   | P62988          |            |            |            |            |            | ND             |            |            |            |            |            | ND             |              |              |              | 2.22         |              |              |               |             |             | 2.22        |             |             |             | 2.12          | 2.23 | 2.18 |       |      |
| <i>UDP-GlcNAc:betaGal beta-1,3-N-acetylgluc</i>    | Q8NFL0          |            |            | 1.32       |            |            | 1.32           |            |            |            |            | 1.13       | 1.13           |              |              |              |              |              |              |               |             |             |             |             |             |             |               |      | ND   |       |      |
| <i>Uncharacterized protein C12orf70</i>            | A6NFE2          |            |            |            |            |            | ND             |            |            |            |            |            | ND             |              |              |              |              |              |              |               |             |             |             |             |             |             |               |      | ND   |       |      |
| <i>UTP--glucose-1-phosphate uridylyltransfera</i>  | Q16851          |            |            |            |            |            | ND             |            |            |            |            |            | ND             |              |              |              |              |              |              |               |             |             |             |             |             |             |               |      | ND   |       |      |
| <i>Vacuolar protein sorting-associated protein</i> | Q9P253          |            |            |            |            |            | ND             |            |            |            |            |            | ND             |              |              |              |              |              |              |               |             |             |             |             |             |             |               |      | ND   |       |      |
| <i>Vascular endothelial growth factor receptor</i> | P17948          |            | 4.65       |            |            |            | 4.65           |            |            | 4.18       |            |            | 4.18           |              |              |              |              |              |              |               |             |             |             |             |             |             |               |      | ND   |       |      |
| <b>Protein name</b>                                | <b>Accesion</b> | <b>AF7</b> | <b>AF6</b> | <b>AF3</b> | <b>AF9</b> | <b>AF2</b> | <b>AF-mean</b> | <b>NP7</b> | <b>NP6</b> | <b>NP3</b> | <b>NP9</b> | <b>NP2</b> | <b>NP-mean</b> | <b>R (A)</b> | <b>R (B)</b> | <b>R (C)</b> | <b>R (D)</b> | <b>R (E)</b> | <b>R (F)</b> | <b>R-mean</b> | <b>T(A)</b> | <b>T(B)</b> | <b>T(C)</b> | <b>T(D)</b> | <b>T(E)</b> | <b>T(F)</b> | <b>T-mean</b> |      |      |       |      |

|                                  |                  |            |            |            |            |            |                |            |            |            |            |            |                |              |              |              |              |              |              |               |              |              |              |              |              |              |               |
|----------------------------------|------------------|------------|------------|------------|------------|------------|----------------|------------|------------|------------|------------|------------|----------------|--------------|--------------|--------------|--------------|--------------|--------------|---------------|--------------|--------------|--------------|--------------|--------------|--------------|---------------|
| <i>Versican core protein</i>     | P13611           | 2.29       | 1.80       | 3.101      | 2.17       | 1.97       | 2.27           | 1.78       | 1.86       | 3.535      | 3.68       | 4.19       | 3.01           |              |              |              | 0.30         |              |              |               | 0.24         | 0.37         | 0.31         |              |              |              |               |
| <i>Vimentin</i>                  | P08670           | 0.40       | 0.24       | 0.309      | 0.16       | 0.20       | 0.26           | 0.24       | 0.27       | 0.349      | 0.08       | 0.23       | 0.23           | 0.92         | 0.73         | 1.13         | 1.78         | 0.60         | 0.54         | 0.95          | 2.81         | 3.31         | 3.18         | 1.91         | 1.01         | 2.43         | 2.44          |
| <i>Vitamin D-binding protein</i> | P02774           |            | 0.22       |            | 0.46       | 1.50       | 0.73           |            | 0.00       |            | 0.11       | 8.90       | 3.00           |              |              |              |              |              |              | ND            |              |              |              |              |              |              | ND            |
| <i>Vitrin</i>                    | Q6UXI7           |            |            |            |            |            | ND             |            |            |            |            |            | ND             |              |              |              |              |              |              | ND            |              |              |              |              |              |              | ND            |
| <i>Vitronectin</i>               | P04004           | 1.12       | 0.71       | 0.509      | 0.37       | 0.73       | 0.69           | 0.90       | 0.56       | 0.604      | 0.15       | 2.24       | 0.89           |              |              |              | 0.73         |              |              | 0.73          |              |              |              | 1.54         | 1.29         | 1.41         |               |
| <i>Zinc-alpha-2-glycoprotein</i> | P25311           |            |            |            |            | 3.71       | 3.71           |            |            |            |            | 7.91       | 7.91           |              |              |              |              |              |              | ND            |              |              |              |              |              |              | ND            |
| <b>Protein name</b>              | <b>Accession</b> | <b>AF7</b> | <b>AF6</b> | <b>AF3</b> | <b>AF9</b> | <b>AF2</b> | <b>AF-mean</b> | <b>NP7</b> | <b>NP6</b> | <b>NP3</b> | <b>NP9</b> | <b>NP2</b> | <b>NP-mean</b> | <b>R (A)</b> | <b>R (B)</b> | <b>R (C)</b> | <b>R (D)</b> | <b>R (E)</b> | <b>R (F)</b> | <b>R-mean</b> | <b>T (A)</b> | <b>T (B)</b> | <b>T (C)</b> | <b>T (D)</b> | <b>T (E)</b> | <b>T (F)</b> | <b>T-mean</b> |



|                                  |                  |            |            |            |            |            |                |            |            |            |            |            |                |              |              |              |              |              |              |               |              |              |              |              |              |              |               |    |
|----------------------------------|------------------|------------|------------|------------|------------|------------|----------------|------------|------------|------------|------------|------------|----------------|--------------|--------------|--------------|--------------|--------------|--------------|---------------|--------------|--------------|--------------|--------------|--------------|--------------|---------------|----|
| <i>Versican core protein</i>     | P13611           | 2.29       | 1.80       | 3.101      | 2.17       | 1.97       | 2.27           | 1.78       | 1.86       | 3.535      | 3.68       | 4.19       | 3.01           |              |              |              | 0.30         |              |              |               | 0.24         | 0.37         | 0.31         |              |              |              |               |    |
| <i>Vimentin</i>                  | P08670           | 0.40       | 0.24       | 0.309      | 0.16       | 0.20       | 0.26           | 0.24       | 0.27       | 0.349      | 0.08       | 0.23       | 0.23           | 0.92         | 0.73         | 1.13         | 1.78         | 0.60         | 0.54         | 0.95          | 2.81         | 3.31         | 3.18         | 1.91         | 1.01         | 2.43         | 2.44          |    |
| <i>Vitamin D-binding protein</i> | P02774           |            | 0.22       |            | 0.46       | 1.50       | 0.73           |            | 0.00       |            | 0.11       | 8.90       | 3.00           |              |              |              |              |              |              | ND            |              |              |              |              |              |              | ND            |    |
| <i>Vitrin</i>                    | Q6UXI7           |            |            |            |            |            | ND             |            |            |            |            |            | ND             |              |              |              |              |              |              | ND            |              |              |              |              |              |              |               | ND |
| <i>Vitronectin</i>               | P04004           | 1.12       | 0.71       | 0.509      | 0.37       | 0.73       | 0.69           | 0.90       | 0.56       | 0.604      | 0.15       | 2.24       | 0.89           |              |              |              | 0.73         |              |              | 0.73          |              |              |              | 1.54         | 1.29         | 1.41         |               |    |
| <i>Zinc-alpha-2-glycoprotein</i> | P25311           |            |            |            |            | 3.71       | 3.71           |            |            |            |            | 7.91       | 7.91           |              |              |              |              |              |              | ND            |              |              |              |              |              |              | ND            |    |
| <b>Protein name</b>              | <b>Accession</b> | <b>AF7</b> | <b>AF6</b> | <b>AF3</b> | <b>AF9</b> | <b>AF2</b> | <b>AF-mean</b> | <b>NP7</b> | <b>NP6</b> | <b>NP3</b> | <b>NP9</b> | <b>NP2</b> | <b>NP-mean</b> | <b>R (A)</b> | <b>R (B)</b> | <b>R (C)</b> | <b>R (D)</b> | <b>R (E)</b> | <b>R (F)</b> | <b>R-mean</b> | <b>T (A)</b> | <b>T (B)</b> | <b>T (C)</b> | <b>T (D)</b> | <b>T (E)</b> | <b>T (F)</b> | <b>T-mean</b> |    |

**Supplemental table 2**

| <b>Intracellular proteins</b>                                            | <b>Plasma proteins</b>                       | <b>insufficient amount of data (&lt;50%)</b>                |
|--------------------------------------------------------------------------|----------------------------------------------|-------------------------------------------------------------|
| <i>14-3-3 protein eta</i>                                                | <i>Alpha-1-acid glycoprotein 1</i>           | <i>Bone morphogenetic protein 3b</i>                        |
| <i>14-3-3 protein gamma</i>                                              | <i>Alpha-1B-glycoprotein</i>                 | <i>Cathepsin D</i>                                          |
| <i>14-3-3 protein theta</i>                                              | <i>Alpha-2-HS-glycoprotein</i>               | <i>Cathepsin G</i>                                          |
| <i>14-3-3 protein zeta/delta</i>                                         | <i>Alpha-2-macroglobulin</i>                 | <i>CD44 antigen</i>                                         |
| <i>1-phosphatidylinositol-4,5-bisphosphate phosphodiesterase delta-1</i> | <i>Antithrombin-III</i>                      | <i>CD9 antigen</i>                                          |
| <i>40S ribosomal protein S20</i>                                         | <i>Beta-2-glycoprotein 1</i>                 | <i>Chordin-like protein 2</i>                               |
| <i>4-trimethylaminobutyraldehyde dehydrogenase</i>                       | <i>Ceruloplasmin</i>                         | <i>Collagen alpha-1(XII) chain</i>                          |
| <i>78 kDa glucose-regulated protein</i>                                  | <i>Coagulation factor XIII A chain</i>       | <i>Collagen alpha-1(XXI) chain</i>                          |
| <i>Actin, alpha cardiac muscle 1</i>                                     | <i>Complement C1q subcomponent A</i>         | <i>Collagen alpha-1(XXIII) chain</i>                        |
| <i>Actin, aortic smooth muscle</i>                                       | <i>Complement C1s subcomponent</i>           | <i>Collagen alpha-3(IX) chain</i>                           |
| <i>Actin, cytoplasmic 1</i>                                              | <i>Complement C3</i>                         | <i>Cysteine-rich protein 2</i>                              |
| <i>Adenomatous polyposis coli protein 2</i>                              | <i>Complement C4-A</i>                       | <i>Fin bud initiation factor homolog</i>                    |
| <i>Adenylate kinase isoenzyme 1</i>                                      | <i>Complement factor B</i>                   | <i>HEAT repeat-containing protein 7A</i>                    |
| <i>Adenylyl cyclase-associated protein 1</i>                             | <i>Complement factor D</i>                   | <i>Hemoglobin subunit gamma-1</i>                           |
| <i>Adipocyte enhancer-binding protein 1</i>                              | <i>Complement factor H</i>                   | <i>Hyaluronan and proteoglycan link protein 4</i>           |
| <i>Adseverin</i>                                                         | <i>Complement factor H-related protein 1</i> | <i>Inhibin beta A chain</i>                                 |
| <i>Alcohol dehydrogenase [NADP+]</i>                                     | <i>Fibrinogen alpha chain</i>                | <i>Insulin-like growth factor-binding protein 7</i>         |
| <i>Alcohol dehydrogenase 1B</i>                                          | <i>Fibrinogen beta chain</i>                 | <i>Kinesin heavy chain isoform 5A</i>                       |
| <i>Alpha-actinin-1</i>                                                   | <i>Fibrinogen gamma chain</i>                | <i>Lactotransferrin</i>                                     |
| <i>Alpha-crystallin B chain</i>                                          | <i>Haptoglobin</i>                           | <i>Melanoma-derived growth regulatory protein</i>           |
| <i>Alpha-enolase</i>                                                     | <i>Haptoglobin-related protein</i>           | <i>Melanotransferrin</i>                                    |
| <i>Annexin A1</i>                                                        | <i>Hemopexin</i>                             | <i>Myeloblastin</i>                                         |
| <i>Annexin A2</i>                                                        | <i>Ig alpha-1 chain C region</i>             | <i>Myocilin</i>                                             |
| <i>Annexin A5</i>                                                        | <i>Ig gamma-1 chain C region</i>             | <i>Pleiotrophin</i>                                         |
| <i>Annexin A6</i>                                                        | <i>Ig gamma-2 chain C region</i>             | <i>Plexin domain-containing protein 2</i>                   |
| <i>Argininosuccinate synthase</i>                                        | <i>Ig gamma-3 chain C region</i>             | <i>Probable serine protease HTRA3</i>                       |
| <i>ATP synthase subunit beta, mitochondrial</i>                          | <i>Ig gamma-4 chain C region</i>             | <i>Protein FAM59B</i>                                       |
| <i>Bardet-Biedl syndrome 12 protein</i>                                  | <i>Ig heavy chain V-I region EU</i>          | <i>Protein S100-A4</i>                                      |
| <i>Beta-enolase</i>                                                      | <i>Ig heavy chain V-III region WEA</i>       | <i>Protein S100-A6</i>                                      |
| <i>Calmodulin</i>                                                        | <i>Ig kappa chain C region</i>               | <i>Protein S100-A8</i>                                      |
| <i>Carbohydrate sulfotransferase 3</i>                                   | <i>Ig kappa chain V-III region SIE</i>       | <i>Retinol-binding protein 4</i>                            |
| <i>Carbonic anhydrase 1</i>                                              | <i>Ig lambda chain C regions</i>             | <i>Putative V-set and Ig-domain-containing-like protein</i> |
| <i>Carbonic anhydrase 2</i>                                              | <i>Leukocyte elastase</i>                    | <i>Semaphorin-4A</i>                                        |
| <i>Carbonic anhydrase 3</i>                                              | <i>Pigment epithelium-derived factor</i>     | <i>Semaphorin-4C</i>                                        |
| <i>Carbonyl reductase [NADPH] 3</i>                                      | <i>Plasma protease C1 inhibitor</i>          | <i>Stanniocalcin-2</i>                                      |
| <i>Cofilin-1</i>                                                         | <i>Plasma serine protease inhibitor</i>      | <i>Stromal cell-derived factor 1</i>                        |

|                                                                         |                                          |                                                      |
|-------------------------------------------------------------------------|------------------------------------------|------------------------------------------------------|
| <i>Creatine kinase M-type</i>                                           | <i>Plasminogen activator inhibitor 1</i> | <i>Stromelysin-1</i>                                 |
| <i>Cystatin-B</i>                                                       | <i>Plasminogen</i>                       | <i>Thrombospondin-4</i>                              |
| <i>Cystatin-C</i>                                                       | <i>Prothrombin</i>                       | <i>Transmembrane protein 132D</i>                    |
| <i>Dextrin</i>                                                          | <i>Serotransferrin</i>                   | <i>Tryptase beta-1</i>                               |
| <i>Dihydropyrimidinase-related protein 2</i>                            | <i>Serum albumin</i>                     | <i>Uncharacterized protein C12orf70</i>              |
| <i>Dihydropyrimidinase-related protein 3</i>                            | <i>Serum amyloid P-component</i>         | <i>Vascular endothelial growth factor receptor 1</i> |
| <i>Disheveled-associated activator of morphogenesis 2</i>               | <i>Transthyretin</i>                     |                                                      |
| <i>Dolichyl-diphosphooligosaccharide--protein glycosyltransferase 1</i> | <i>Vitamin D-binding protein</i>         |                                                      |
| <i>EH domain-containing protein 2</i>                                   | <i>Zinc-alpha-2-glycoprotein</i>         |                                                      |
| <i>Elongation factor Tu GTP-binding domain-containing protein 1</i>     |                                          |                                                      |
| <i>Endoplasmin</i>                                                      |                                          |                                                      |
| <i>Fascin</i>                                                           |                                          |                                                      |
| <i>Fatty acid desaturase 2-like protein</i>                             |                                          |                                                      |
| <i>Fatty acid-binding protein, adipocyte</i>                            |                                          |                                                      |
| <i>F-box only protein 2</i>                                             |                                          |                                                      |
| <i>F-box/WD repeat-containing protein 12</i>                            |                                          |                                                      |
| <i>Ferritin heavy chain</i>                                             |                                          |                                                      |
| <i>Ferritin light chain</i>                                             |                                          |                                                      |
| <i>Filamin-B</i>                                                        |                                          |                                                      |
| <i>Flavin reductase</i>                                                 |                                          |                                                      |
| <i>Four and a half LIM domains protein 1</i>                            |                                          |                                                      |
| <i>Fructose-bisphosphate aldolase A</i>                                 |                                          |                                                      |
| <i>Gelsolin</i>                                                         |                                          |                                                      |
| <i>Glutathione peroxidase 3</i>                                         |                                          |                                                      |
| <i>Glutathione S-transferase P</i>                                      |                                          |                                                      |
| <i>Glyceraldehyde-3-phosphate dehydrogenase</i>                         |                                          |                                                      |
| <i>Glycogen phosphorylase, brain form</i>                               |                                          |                                                      |
| <i>Glycogen phosphorylase, liver form</i>                               |                                          |                                                      |
| <i>Heat shock 70 kDa protein 1</i>                                      |                                          |                                                      |
| <i>Heat shock 70 kDa protein 6</i>                                      |                                          |                                                      |
| <i>Heat shock cognate 71 kDa protein</i>                                |                                          |                                                      |
| <i>Heat shock protein beta-1</i>                                        |                                          |                                                      |
| <i>Heat shock protein HSP 90-alpha</i>                                  |                                          |                                                      |
| <i>Hemoglobin subunit alpha</i>                                         |                                          |                                                      |
| <i>Hemoglobin subunit beta</i>                                          |                                          |                                                      |
| <i>Hemoglobin subunit delta</i>                                         |                                          |                                                      |
| <i>Heterogeneous nuclear ribonucleoprotein D0</i>                       |                                          |                                                      |
| <i>Histone H1,0</i>                                                     |                                          |                                                      |

|                                                            |  |  |
|------------------------------------------------------------|--|--|
| <i>Histone H1,2</i>                                        |  |  |
| <i>Histone H1,3</i>                                        |  |  |
| <i>Histone H1,4</i>                                        |  |  |
| <i>Histone H1,5</i>                                        |  |  |
| <i>Histone H2A type 1</i>                                  |  |  |
| <i>Histone H2B type 1-B</i>                                |  |  |
| <i>Histone H2B type 1-D</i>                                |  |  |
| <i>Histone H2B type 1-K</i>                                |  |  |
| <i>Histone H2B type 2-E</i>                                |  |  |
| <i>Histone H3,2</i>                                        |  |  |
| <i>Histone H3,3</i>                                        |  |  |
| <i>Histone H3-like</i>                                     |  |  |
| <i>Histone H4</i>                                          |  |  |
| <i>Histone-lysine N-methyltransferase MLL3</i>             |  |  |
| <i>Homeobox protein Hox-D13</i>                            |  |  |
| <i>Homeobox-containing protein 1</i>                       |  |  |
| <i>Isocitrate dehydrogenase [NADP] cytoplasmic</i>         |  |  |
| <i>Keratin, type II cytoskeletal 1</i>                     |  |  |
| <i>Lambda-crystallin homolog</i>                           |  |  |
| <i>Lamin-A/C</i>                                           |  |  |
| <i>Leucine-rich alpha-2-glycoprotein</i>                   |  |  |
| <i>Leukocyte cell-derived chemotaxin-2</i>                 |  |  |
| <i>L-lactate dehydrogenase A chain</i>                     |  |  |
| <i>L-lactate dehydrogenase B chain</i>                     |  |  |
| <i>Malate dehydrogenase, cytoplasmic</i>                   |  |  |
| <i>Malate dehydrogenase, mitochondrial</i>                 |  |  |
| <i>Mitofusin-1</i>                                         |  |  |
| <i>Moesin</i>                                              |  |  |
| <i>Myoglobin</i>                                           |  |  |
| <i>Myosin light polypeptide 6</i>                          |  |  |
| <i>Myosin-2</i>                                            |  |  |
| <i>Myosin-7</i>                                            |  |  |
| <i>Nesprin-2</i>                                           |  |  |
| <i>Neuroblast differentiation-associated protein AHNAK</i> |  |  |
| <i>Neuron navigator 3</i>                                  |  |  |
| <i>Nucleoside diphosphate kinase A</i>                     |  |  |
| <i>Nucleoside diphosphate kinase B</i>                     |  |  |
| <i>Peptidyl-prolyl cis-trans isomerase A</i>               |  |  |

|                                                   |  |  |
|---------------------------------------------------|--|--|
| <i>Peptidyl-prolyl cis-trans isomerase B</i>      |  |  |
| <i>Peptidyl-prolyl cis-trans isomerase C</i>      |  |  |
| <i>Peroxiredoxin-1</i>                            |  |  |
| <i>Peroxiredoxin-2</i>                            |  |  |
| <i>Peroxiredoxin-4</i>                            |  |  |
| <i>Peroxiredoxin-5, mitochondrial</i>             |  |  |
| <i>Peroxiredoxin-6</i>                            |  |  |
| <i>Phosphatidylethanolamine-binding protein 1</i> |  |  |
| <i>Phosphoglycerate kinase 1</i>                  |  |  |
| <i>Phosphoglycerate mutase 1</i>                  |  |  |
| <i>Phosphoglycerate mutase 2</i>                  |  |  |
| <i>Polymerase I and transcript release factor</i> |  |  |
| <i>Profilin-1</i>                                 |  |  |
| <i>Protein disulfide-isomerase A3</i>             |  |  |
| <i>Protein disulfide-isomerase</i>                |  |  |
| <i>Protein piccolo</i>                            |  |  |
| <i>Protein transport protein Sec16B</i>           |  |  |
| <i>Putative annexin A2-like protein</i>           |  |  |
| <i>Putative elongation factor 1-alpha-like 3</i>  |  |  |
| <i>Putative endoplasmic-like protein</i>          |  |  |
| <i>Pyruvate kinase isozymes M1/M2</i>             |  |  |
| <i>Quinone oxidoreductase</i>                     |  |  |
| <i>Rab GDP dissociation inhibitor beta</i>        |  |  |
| <i>Ras GTPase-activating-like protein IQGAP1</i>  |  |  |
| <i>Ras-like protein family member 11A</i>         |  |  |
| <i>Reticulocalbin-3</i>                           |  |  |
| <i>Rho GTPase-activating protein 18-like</i>      |  |  |
| <i>Rho GTPase-activating protein 30</i>           |  |  |
| <i>Ribonuclease 4</i>                             |  |  |
| <i>Ribosome-binding protein 1</i>                 |  |  |
| <i>Secernin-1</i>                                 |  |  |
| <i>Selenium-binding protein 1</i>                 |  |  |
| <i>Spectrin alpha chain, brain</i>                |  |  |
| <i>Superoxide dismutase [Cu-Zn]</i>               |  |  |
| <i>Transaldolase</i>                              |  |  |
| <i>Transgelin</i>                                 |  |  |
| <i>Transketolase</i>                              |  |  |
| <i>Translationally-controlled tumor protein</i>   |  |  |

|                                                                      |  |  |
|----------------------------------------------------------------------|--|--|
| <i>Triosephosphate isomerase</i>                                     |  |  |
| <i>Tropomyosin alpha-4 chain</i>                                     |  |  |
| <i>Tropomyosin beta chain</i>                                        |  |  |
| <i>Tubulin alpha-1C chain</i>                                        |  |  |
| <i>Tubulin beta-2B chain</i>                                         |  |  |
| <i>Tubulin beta-8 chain</i>                                          |  |  |
| <i>Ubiquitin carboxyl-terminal hydrolase 25</i>                      |  |  |
| <i>Ubiquitin</i>                                                     |  |  |
| <i>UDP-GlcNAc:betaGal beta-1,3-N-acetylglucosaminyltransferase 7</i> |  |  |
| <i>UTP--glucose-1-phosphate uridylyltransferase</i>                  |  |  |
| <i>Vacuolar protein sorting-associated protein 18 homolog</i>        |  |  |
| <i>Vimentin</i>                                                      |  |  |

**Table 3a Femoral head vs tibial knee articular cartilage****T-test**

| <b>Protein name</b>                             | <b>Accession</b> | <b>Fold Change</b> | <b>Raw p value</b> |
|-------------------------------------------------|------------------|--------------------|--------------------|
| Hyaluronan and proteoglycan link protein        | P10915           | 2.45               | <0.001             |
| Chondroadherin                                  | O15335           | 2.17               | 0.002              |
| Lactadherin                                     | Q08431           | 2.04               | 0.016              |
| SPARC-related modular calcium-binding protein 2 | Q9H3U7           | 1.97               | <0.001             |
| FGF-binding protein 2                           | Q9BYJ0           | 1.80               | 0.034              |
| Decorin                                         | P07585           | 0.68               | 0.022              |
| Extracellular superoxide dismutase [Cu-Zn]      | P08294           | 0.65               | <0.001             |
| Collagen alpha-3(VI)                            | P12111           | 0.59               | <0.001             |
| Tenascin-X                                      | P22105           | 0.58               | 0.026              |
| Collagen alpha-2(I)                             | P08123           | 0.53               | 0.046              |
| Collagen alpha-1(VI)                            | P12109           | 0.53               | <0.001             |
| Collagen alpha-2(VI)                            | P12110           | 0.52               | <0.001             |
| Alpha-1-antitrypsin                             | P01009           | 0.50               | 0.002              |
| Alpha-1-antichymotrypsin                        | P01011           | 0.50               | 0.024              |
| Collagen alpha-1(III)                           | P02461           | 0.49               | 0.008              |
| Target of Nesh-SH3                              | Q7Z7G0           | 0.44               | 0.022              |
| Lumican                                         | P51884           | 0.32               | <0.001             |
| Asporin                                         | Q9BXN1           | 0.28               | 0.002              |
| Mimecan                                         | P20774           | 0.24               | <0.001             |

**Table 3b Femoral vs humeral head articular cartilage**

|                                                 | <b>T-test</b>    |                    |                    |
|-------------------------------------------------|------------------|--------------------|--------------------|
| <b>Protein name</b>                             | <b>Accession</b> | <b>Fold Change</b> | <b>Raw p value</b> |
| Cartilage intermediate layer protein 1          | O75339           | 3.03               | 0.044              |
| Pleckstrin homology domain-containing family A6 | Q9Y2H5           | 2.75               | 0.03               |
| Matrilin-3                                      | O15232           | 2.72               | <0.001             |
| Phospholipase A2, membrane associated           | P14555           | 2.61               | 0.016              |
| Angiopoietin-related protein 2                  | Q9UKU9           | 2.50               | 0.01               |
| SPARC-related modular calcium-binding protein 2 | Q9H3U7           | 2.46               | <0.001             |
| Serine protease HTRA1                           | Q92743           | 2.04               | 0.018              |
| Clusterin                                       | P10909           | 1.96               | 0.042              |
| Hyaluronan and proteoglycan link protein        | P10915           | 1.81               | 0.006              |
| Aggrecan core protein                           | P16112           | 1.53               | 0.02               |
| Biglycan                                        | P21810           | 0.69               | 0.024              |
| Alpha-1-antitrypsin                             | P01009           | 0.50               | 0.042              |
| Collagen alpha-2(I)                             | P08123           | 0.50               | 0.024              |
| Collagen alpha-3(VI)                            | P12111           | 0.50               | 0.024              |
| Collagen alpha-1(III)                           | P02461           | 0.48               | 0.008              |
| Collagen alpha-1(VI)                            | P12109           | 0.47               | 0.018              |
| Tenascin-X                                      | P22105           | 0.44               | 0.032              |
| Apolipoprotein A-I                              | P02647           | 0.37               | 0.012              |
| Mimecan                                         | P20774           | 0.35               | 0.01               |



**Table 3c Humeral head vs tibial knee articular cartilage****T-test**

| <b>Protein name</b>  | <b>Accession</b> | <b>Fold Change</b> | <b>Raw p value</b> |
|----------------------|------------------|--------------------|--------------------|
| Collagen alpha-1(II) | P02458           | 2.35               | 0.024              |
| Chondroadherin       | O15335           | 2.12               | 0.004              |
| HHIP-like protein 2  | Q6UWX4           | 1.54               | 0.032              |
| Biglycan             | P21810           | 1.53               | 0.048              |
| Fibromodulin         | Q06828           | 1.33               | 0.022              |
| Decorin              | P07585           | 0.66               | 0.038              |
| Lumican              | P51884           | 0.51               | 0.018              |
| Asporin              | Q9BXN1           | 0.44               | 0.01               |

**Table 3d Tibial knee articular cartilage vs meniscal cartilage****T-test**

| <b>Protein name</b>                             | <b>Accession</b> | <b>Fold change</b> | <b>Raw p value</b> |
|-------------------------------------------------|------------------|--------------------|--------------------|
| Pleckstrin homology domain-containing family A6 | Q9Y2H5           | 38.72              | 0.022              |
| Phospholipase A2, membrane associated           | P14555           | 35.40              | 0.032              |
| Hyaluronan and proteoglycan link protein        | P10915           | 14.81              | 0.003              |
| Collagen alpha-1(II)                            | P02458           | 11.27              | 0.006              |
| Aggrecan core protein                           | P16112           | 10.42              | 0.005              |
| Lysozyme C                                      | P61626           | 5.85               | 0.042              |
| Angiogenin                                      | P03950           | 5.63               | 0.009              |
| FGF-binding protein 2                           | Q9BYJ0           | 4.96               | 0.030              |
| Chondroadherin                                  | O15335           | 4.92               | 0.001              |
| Osteoadherin                                    | Q99983           | 4.64               | 0.001              |
| C-type lectin domain family 3A                  | O75596           | 3.63               | 0.006              |
| Sushi repeat-containing protein SRPX2           | O60687           | 3.39               | 0.009              |
| HHIP-like protein 2                             | Q6UWX4           | 3.13               | 0.040              |
| Angiopoietin-related protein 2                  | Q9UKU9           | 3.08               | 0.040              |
| Retinoic acid receptor responder protein 2      | Q99969           | 2.07               | 0.033              |
| Cartilage intermediate layer protein 2          | Q8IUL8           | 2.01               | 0.012              |
| Fibromodulin                                    | Q06828           | 1.56               | 0.020              |
| Collagen alpha-3(VI)                            | P12111           | 0.38               | 0.035              |
| Procollagen C-endopeptidase enhancer 1          | Q15113           | 0.37               | 0.040              |
| Target of Nesh-SH3                              | Q7Z7G0           | 0.34               | 0.043              |
| Tenascin-X                                      | P22105           | 0.29               | 0.020              |
| Versican                                        | P13611           | 0.21               | 0.038              |
| Asporin                                         | Q9BXN1           | 0.18               | 0.022              |
| Apolipoprotein D                                | P05090           | <b>M only</b>      |                    |
| SPARC-related modular calcium-binding protein 2 | Q9H3U7           | <b>K only</b>      |                    |

**Table 3e Femoral head articular cartilage vs annulus fibrosus cartilage****T-test**

| <b>Protein name</b>                             | <b>Accession</b> | <b>Fold Change</b> | <b>Raw p value</b> |
|-------------------------------------------------|------------------|--------------------|--------------------|
| Matrilin-3                                      | O15232           | 16.59              | <0.001             |
| Protein S100-B                                  | P04271           | 6.00               | <0.001             |
| Phospholipase A2, membrane associated           | P14555           | 5.95               | 0.006              |
| Pleckstrin homology domain-containing family A6 | Q9Y2H5           | 5.85               | 0.018              |
| Hyaluronan and proteoglycan link protein        | P10915           | 4.27               | <0.001             |
| Augurin                                         | Q9H1Z8           | 2.63               | <0.001             |
| Retinoic acid receptor responder protein 2      | Q99969           | 2.44               | 0.014              |
| Biglycan                                        | P21810           | 2.35               | <0.001             |
| Collagen alpha-1(II)                            | P02458           | 2.01               | 0.012              |
| Fibromodulin                                    | Q06828           | 1.83               | 0.002              |
| Aggrecan core protein                           | P16112           | 1.50               | 0.016              |
| Decorin                                         | P07585           | 0.72               | 0.03               |
| Extracellular superoxide dismutase [Cu-Zn]      | P08294           | 0.47               | <0.001             |
| Alpha-1-antichymotrypsin                        | P01011           | 0.44               | 0.01               |
| Asporin                                         | Q9BXN1           | 0.42               | 0.012              |
| Alpha-1-antitrypsin                             | P01009           | 0.41               | <0.001             |
| Collagen alpha-2(XI)                            | P13942           | 0.38               | 0.048              |
| Coiled-coil domain-containing protein 80        | Q76M96           | 0.35               | 0.018              |
| Serine protease HTRA1                           | Q92743           | 0.35               | 0.008              |
| Fibronectin                                     | P02751           | 0.31               | 0.014              |
| Lubricin (Proteglycan 4)                        | Q92954           | 0.27               | 0.02               |
| Mimecan                                         | P20774           | 0.26               | 0.002              |
| Lumican                                         | P51884           | 0.20               | <0.001             |
| Collagen alpha-2(I)                             | P08123           | 0.18               | <0.001             |
| Protein S100-A9                                 | P06702           | 0.17               | 0.006              |
| Glia-derived nexin                              | P07093           | 0.17               | 0.026              |
| Versican                                        | P13611           | 0.11               | <0.001             |
| Target of Nesh-SH3                              | Q7Z7G0           | 0.07               | 0.004              |
| Apolipoprotein D                                | P05090           | <b>AF only</b>     |                    |
| SPARC-related modular calcium-binding protein 2 | Q9H3U7           | <b>F only</b>      |                    |

**Table 3f Femoral head articular cartilage vs nucleus pulposus cartilage****T-test**

| <b>Protein name</b>                                   | <b>Accesion</b> | <b>Fold Change</b> | <b>Raw p value</b> |
|-------------------------------------------------------|-----------------|--------------------|--------------------|
| Matrilin-3                                            | O15232          | 23.36              | <0.001             |
| Tetranectin                                           | P05452          | 11.87              | <0.001             |
| Hyaluronan and proteoglycan link protein              | P10915          | 6.97               | <0.001             |
| Phospholipase A2, membrane associated                 | P14555          | 6.94               | 0.004              |
| Pleckstrin homology domain-containing family A6       | Q9Y2H5          | 5.44               | 0.048              |
| Protein S100-B                                        | P04271          | 4.86               | 0.008              |
| Fibromodulin                                          | Q06828          | 4.57               | <0.001             |
| Biglycan                                              | P21810          | 3.74               | <0.001             |
| Retinoic acid receptor responder protein 2            | Q99969          | 3.58               | 0.012              |
| Thrombospondin-1                                      | P07996          | 2.89               | 0.03               |
| Collagen alpha-1(II)                                  | P02458          | 2.49               | <0.001             |
| Basement membrane-specific HS proteoglycan (Perlecan) | P98160          | 2.48               | 0.036              |
| Lactadherin                                           | Q08431          | 2.48               | 0.02               |
| PRELP                                                 | P51888          | 2.32               | <0.001             |
| Aggrecan core protein                                 | P16112          | 1.78               | <0.001             |
| FGF-binding protein 2                                 | Q9BYJ0          | 1.73               | 0.026              |
| Decorin                                               | P07585          | 1.54               | 0.038              |
| Extracellular superoxide dismutase [Cu-Zn]            | P08294          | 0.48               | 0.024              |
| Collagen alpha-2(I)                                   | P08123          | 0.44               | 0.016              |
| Asporin                                               | Q9BXN1          | 0.39               | 0.006              |
| Serine protease HTRA1                                 | Q92743          | 0.38               | 0.008              |
| Mimecan                                               | P20774          | 0.37               | 0.018              |
| TNF receptor superfamily member 11B                   | O00300          | 0.36               | <0.001             |
| Fibronectin                                           | P02751          | 0.31               | 0.016              |
| Coiled-coil domain-containing protein 80              | Q76M96          | 0.29               | 0.036              |
| Lumican                                               | P51884          | 0.25               | <0.001             |
| Alpha-1-antitrypsin                                   | P01009          | 0.18               | 0.004              |
| Alpha-1-antichymotrypsin                              | P01011          | 0.14               | 0.012              |
| Glia-derived nexin                                    | P07093          | 0.13               | <0.001             |
| Protein S100-A9                                       | P06702          | 0.13               | <0.001             |
| Lubricin (Proteglycan 4)                              | Q92954          | 0.11               | <0.001             |
| Versican                                              | P13611          | 0.08               | <0.001             |
| Target of Nesh-SH3                                    | Q7Z7G0          | 0.06               | 0.002              |
| Apolipoprotein D                                      | P05090          | <b>NP only</b>     |                    |
| SPARC-related modular calcium-binding protein 2       | Q9H3U7          | <b>F only</b>      |                    |

**Table 3g Femoral head articular cartilage vs rib cartilage**

| Protein name                                      | Accession | T-test        |             |
|---------------------------------------------------|-----------|---------------|-------------|
|                                                   |           | Fold Change   | Raw p value |
| Pleckstrin homology domain-containing family A6   | Q9Y2H5    | 6.63          | <0.001      |
| Cartilage intermediate layer protein 2            | Q8IUL8    | 6.55          | <0.001      |
| Cartilage oligomeric matrix protein               | P49747    | 6.48          | <0.001      |
| Lubricin (Proteglycan 4)                          | Q92954    | 6.22          | <0.001      |
| Phospholipase A2, membrane associated             | P14555    | 5.65          | <0.001      |
| Serine protease HTRA1                             | Q92743    | 3.77          | <0.001      |
| Collagen alpha-1(III)                             | P02461    | 3.36          | <0.001      |
| Mimecan                                           | P20774    | 3.17          | <0.001      |
| Clusterin                                         | P10909    | 2.52          | 0.002       |
| Target of Nesh-SH3                                | Q7Z7G0    | 2.27          | 0.008       |
| Decorin                                           | P07585    | 2.12          | <0.001      |
| Retinoic acid receptor responder protein 2        | Q99969    | 1.91          | 0.02        |
| Lumican                                           | P51884    | 1.78          | 0.046       |
| Hyaluronan and proteoglycan link protein          | P10915    | 1.33          | 0.046       |
| Chondroadherin                                    | O15335    | 0.65          | 0.002       |
| Collagen alpha-2(I)                               | P08123    | 0.61          | 0.012       |
| Lactadherin                                       | Q08431    | 0.41          | 0.008       |
| Extracellular superoxide dismutase [Cu-Zn]        | P08294    | 0.37          | 0.02        |
| Sushi repeat-containing protein SRPX2             | O60687    | 0.33          | 0.012       |
| Lysozyme C                                        | P61626    | 0.32          | 0.014       |
| Alpha-1-antitrypsin                               | P01009    | 0.29          | 0.006       |
| Coiled-coil domain-containing protein 80          | Q76M96    | 0.29          | 0.028       |
| SPARC                                             | P09486    | 0.13          | 0.02        |
| Chondromodulin-1                                  | O75829    | 0.12          | <0.001      |
| Cartilage matrix protein                          | P21941    | 0.02          | 0.008       |
| Epiphycan                                         | Q99645    | <b>R only</b> |             |
| C-X-C motif chemokine 14                          | O95715    | <b>R only</b> |             |
| Immunoglobulin superfamily containing LRR protein | O14498    | <b>R only</b> |             |
| Microfibril-associated glycoprotein 4             | P55083    | <b>R only</b> |             |
| Secreted frizzled-related protein 3               | Q92765    | <b>R only</b> |             |
| SPARC-related modular calcium-binding protein 2   | Q9H3U7    | <b>F only</b> |             |
| Tenascin-X                                        | P22105    | <b>F only</b> |             |

**Table 3h Femoral head articular cartilage vs tracheal cartilage**

| Protein name                                          | Accession | T-test        |             |
|-------------------------------------------------------|-----------|---------------|-------------|
|                                                       |           | Fold Change   | Raw p value |
| Cartilage oligomeric matrix protein                   | P49747    | 22.24         | <0.001      |
| Thrombospondin-3                                      | P49476    | 9.81          | 0.022       |
| Cartilage intermediate layer protein 1                | O75339    | 9.29          | <0.001      |
| Cartilage intermediate layer protein 2                | Q8IUL8    | 7.15          | 0.008       |
| Decorin                                               | P07585    | 5.58          | <0.001      |
| Lubricin (Proteglycan 4)                              | Q92954    | 5.44          | <0.001      |
| Fibronectin                                           | P02751    | 4.44          | 0.004       |
| Phospholipase A2, membrane associated                 | P14555    | 4.19          | 0.004       |
| Clusterin                                             | P10909    | 3.26          | 0.01        |
| Collagen alpha-1(III)                                 | P02461    | 3.25          | <0.001      |
| Serine protease HTRA1                                 | Q92743    | 3.04          | 0.01        |
| Augurin                                               | Q9H1Z8    | 2.95          | 0.006       |
| FGF-binding protein 2                                 | Q9BYJ0    | 2.77          | 0.01        |
| Lumican                                               | P51884    | 2.66          | <0.001      |
| Pleckstrin homology domain-containing family A6       | Q9Y2H5    | 2.53          | 0.026       |
| Aggrecan core protein                                 | P16112    | 1.61          | 0.006       |
| Hyaluronan and proteoglycan link protein              | P10915    | 1.57          | <0.001      |
| Alpha-1-antitrypsin                                   | P01009    | 0.61          | 0.04        |
| Basement membrane-specific HS proteoglycan (Perlecan) | P98160    | 0.56          | 0.014       |
| Collagen alpha-2(VI)                                  | P12110    | 0.51          | 0.032       |
| Lactadherin                                           | Q08431    | 0.51          | 0.038       |
| Collagen alpha-1(VI)                                  | P12109    | 0.50          | 0.032       |
| Leukocyte cell-derived chemotaxin-2                   | O14960    | 0.46          | 0.026       |
| Collagen alpha-3(VI)                                  | P12111    | 0.46          | 0.002       |
| Sushi repeat-containing protein SRPX2                 | O60687    | 0.43          | 0.012       |
| Protein S100-B                                        | P04271    | 0.36          | 0.002       |
| Collagen alpha-2(I)                                   | P08123    | 0.35          | 0.002       |
| Galectin-1                                            | P09382    | 0.35          | <0.001      |
| TGF-beta-induced protein ig-h3                        | Q15582    | 0.33          | 0.002       |
| Lysozyme C                                            | P61626    | 0.11          | <0.001      |
| Chondromodulin-1                                      | O75829    | 0.10          | 0.004       |
| Cartilage matrix protein                              | P21941    | 0.02          | 0.002       |
| Epiphycan                                             | Q99645    | <b>T only</b> |             |
| C-X-C motif chemokine 14                              | O95715    | <b>T only</b> |             |
| Immunoglobulin superfamily containing LRR protein     | O14498    | <b>T only</b> |             |
| Microfibril-associated glycoprotein 4                 | P55083    | <b>T only</b> |             |
| Secreted frizzled-related protein 3                   | Q92765    | <b>T only</b> |             |
| Tenascin-X                                            | P22105    | <b>F only</b> |             |
| SPARC-related modular calcium-binding protein 2       | Q9H3U7    | <b>F only</b> |             |

**Table 3i Annulus fibrosus vs nucleus pulposus cartilage**

| <b>Protein name</b>                      | <b>Accession</b> | <b>T-test</b>      |                    |
|------------------------------------------|------------------|--------------------|--------------------|
|                                          |                  | <b>Fold Change</b> | <b>Raw p value</b> |
| Collagen alpha-1(V)                      | P20908           | 2.74               | 0.034              |
| Thrombospondin-1                         | P07996           | 2.68               | 0.03               |
| Fibromodulin                             | Q06828           | 2.50               | 0.006              |
| Collagen alpha-2(I)                      | P08123           | 2.40               | <0.001             |
| Decorin                                  | P07585           | 2.15               | 0.008              |
| PRELP                                    | P51888           | 2.03               | 0.004              |
| Cartilage intermediate layer protein 1   | O75339           | 1.70               | 0.022              |
| Hyaluronan and proteoglycan link protein | P10915           | 1.63               | 0.046              |
| Biglycan                                 | P21810           | 1.59               | 0.02               |
| C-type lectin domain family 3A           | O75596           | 1.38               | 0.032              |
| Alpha-1-antitrypsin                      | P01009           | 0.44               | <0.001             |
| Apolipoprotein D                         | P05090           | 0.32               | 0.05               |

**Table 3j Annulus fibrosus vs meniscal cartilage**

| <b>Protein name</b>                      | <b>Accession</b> | <b>T-test</b>      |                    |
|------------------------------------------|------------------|--------------------|--------------------|
|                                          |                  | <b>Fold-Change</b> | <b>Raw p value</b> |
| Coiled-coil domain-containing protein 80 | Q76M96           | 14.56              | 0.015              |
| Lysozyme C                               | P61626           | 10.69              | 0.010              |
| Fibronectin                              | P02751           | 10.08              | 0.012              |
| Chondroadherin                           | O15335           | 9.62               | 0.001              |
| Aggrecan core protein                    | P16112           | 9.44               | 0.001              |
| Angiogenin                               | P03950           | 9.05               | 0.008              |
| Hyaluronan and proteoglycan link protein | P10915           | 8.49               | 0.011              |
| Phospholipase A2, membrane associated    | P14555           | 8.16               | 0.014              |
| Collagen alpha-1(II)                     | P02458           | 6.84               | 0.020              |
| FGF-binding protein 2                    | Q9BYJ0           | 6.58               | 0.000              |
| Protein S100-A9                          | P06702           | 6.46               | 0.019              |
| Glia-derived nexin                       | P07093           | 5.94               | 0.030              |
| C-type lectin domain family 3A           | O75596           | 5.35               | 0.000              |
| Serine protease HTRA1                    | Q92743           | 5.02               | 0.023              |
| HHIP-like protein 2                      | Q6UWX4           | 4.30               | 0.025              |
| Cartilage intermediate layer protein 1   | O75339           | 3.08               | 0.001              |
| Target of Nesh-SH3                       | Q7Z7G0           | 2.06               | 0.015              |
| Sushi repeat-containing protein SRPX2    | O60687           | 1.81               | 0.015              |
| Collagen alpha-2(VI)                     | P12110           | 0.33               | 0.041              |
| Collagen alpha-3(VI)                     | P12111           | 0.31               | 0.026              |
| Collagen alpha-1(VI)                     | P12109           | 0.29               | 0.042              |
| Apolipoprotein A-I                       | P02647           | 0.23               | 0.033              |
| Vitronectin                              | P04004           | 0.17               | 0.040              |
| Tenascin-X                               | P22105           | 0.16               | 0.011              |
| Asporin                                  | Q9BXN1           | 0.12               | 0.018              |



**Table 3k Rib vs tracheal cartilage**

| <b>Protein name</b>                                 | <b>Accession</b> | <b>T-test</b>      |                    |
|-----------------------------------------------------|------------------|--------------------|--------------------|
|                                                     |                  | <b>Fold Change</b> | <b>Raw p value</b> |
| Fibronectin                                         | P02751           | 5.94               | 0.018              |
| Cartilage intermediate layer protein 1              | O75339           | 4.44               | 0.018              |
| Augurin                                             | Q9H1Z8           | 3.75               | 0.042              |
| Cartilage oligomeric matrix protein                 | P49747           | 3.43               | 0.008              |
| SPARC                                               | P09486           | 3.25               | 0.034              |
| Decorin                                             | P07585           | 2.64               | 0.018              |
| Extracellular superoxide dismutase [Cu-Zn]          | P08294           | 2.38               | 0.032              |
| Microfibril-associated glycoprotein 4               | P55083           | 0.61               | 0.014              |
| Collagen alpha-2(I)                                 | P08123           | 0.58               | 0.012              |
| Galectin-1                                          | P09382           | 0.58               | 0.024              |
| Mimecan                                             | P20774           | 0.55               | 0.022              |
| Collagen alpha-2(VI)                                | P12110           | 0.54               | 0.038              |
| Collagen alpha-3(VI)                                | P12111           | 0.52               | 0.022              |
| Leukocyte cell-derived chemotaxin-2                 | O14960           | 0.46               | 0.018              |
| Pleckstrin homology domain-containing family A6     | Q9Y2H5           | 0.38               | 0.032              |
| Lysozyme C                                          | P61626           | 0.33               | 0.01               |
| Tetranectin                                         | P05452           | 0.33               | 0.032              |
| Hemoglobin subunit beta                             | P68871           | 0.31               | 0.016              |
| Hemoglobin subunit alpha                            | P69905           | 0.31               | 0.036              |
| Inter-trypsin inhibitor heavy chain H5-like protein | Q6UXX5           | 0.27               | 0.034              |
